# Supplementary material for: Crystal structure landscape of conformationally flexible organo-fluorine compounds
Source: Royal Society of Chemistry journal article supplement (doi:10.1039/c5ce01721a), 2015-11-17

## Crystal structure landscape in conformationally flexible organo-fluorine compounds

P. K. Mondal<sup>o</sup> and D. Chopra\*<sup>o</sup>

<sup>o</sup> Department of Chemistry, Indian Institute of Science Education and Research Bhopal, Fax: +91-755-6692392

E-Mail: [dchopra@iiserb.ac.in](mailto:dchopra@iiserb.ac.in)

### Sections:

S-1: Synthesis and Characterization

S-2: X-ray crystallography and computational

### List of Tables:

T-1: Crystallographic and refinement data

T-2: Top 100 polymorph predictions for unsubstituted benzanilide.

T-3: The lattice energy (in kJ/mol) of all the experimental crystal structures.

T-4: Experimental structures of fluorinated benzanilides in decafluoro-substituted benzanilide (all the hydrogen atoms are replaced by fluorine atoms) landscape.

T-5: Top 100 polymorph predictions for decafluoro-substituted benzanilide (all the hydrogen atoms are replaced by fluorine atoms).

### List of Figures:

F-1: Molecular diagram of the experimental structures depicting the atomic connectivity.

F-2: Overlay diagrams for the experimentally (green) obtained fluoro-substituted benzanilides and predicted (purple) structure of unsubstituted benzanilide.

F-3: Plot of relative lattice energies versus densities of the experimental crystal structures in different space groups.

F-4: Plot of relative lattice energies versus densities of the top 100 predicted structure of decafluoro-substituted benzanilide (all the hydrogen atoms are replaced by fluorine atoms) in different space groups.

F-5: <sup>1</sup>H-NMR Spectra of the synthesised compounds

F-6: DSC traces of synthesised compounds @5°C/min.

### S-1: Synthesis and Characterization

All the starting materials [difluoro-substituted benzoyl chlorides, difluoro- substituted anilines and dimethylaminopyridine (DMAP)] were purchased from Sigma-Aldrich and were used without further purification. Dichloromethane ( $\text{CH}_2\text{Cl}_2$ ) was used as the reaction solvent that was dried using calcium hydride ( $\text{CaH}_2$ ) and molecular sieves were used for storing. The fluorinated amines (1.0 equiv.) and DMAP (1.2 equiv.) were dissolved in 10 ml dry  $\text{CH}_2\text{Cl}_2$  in a round bottomed flask. The reaction mixture was allowed to cool to 0 °C in an ice bath in a dry nitrogen atmosphere and then the corresponding difluoro-benzoyl chlorides (1.1 equiv.) was added dropwise. The reaction mixture was allowed to come to room temperature and kept for a period of 4-6 hours. At the end of the reaction, the reaction product was confirmed by TLC monitoring, and the reaction mixture was quenched with 5% HCl. The compound was isolated by  $\text{CH}_2\text{Cl}_2$  extraction and dried using sodium sulfate ( $\text{Na}_2\text{SO}_4$ ). The compound was purified by column chromatography using silica and  $\text{CH}_2\text{Cl}_2$ /hexane solvent system.  $^1\text{H}$  NMR and melting point measurements were performed for characterization of the synthesized compounds.

### S-2: X-ray crystallography and computational

Single crystal X-ray data of these compounds were collected on a Bruker D8 venture PHOTON 100 CMOS diffractometer using Mo  $\text{K}\alpha$  radiation ( $\lambda = 0.7107 \text{ \AA}$ ) at 100(2) K and absorption was done using SADABS [1]. All crystal data [T-1] were solved by directed method using SIR92 [2], and refinement were performed using SHELXL97 [3] present in the program suite WinGX [4]. Mercury version 3.3 (CCDC) [5] program was used for molecular representations and overlay. For the PIXEL energy calculation, the molecular electron densities were generated by Gaussian09 [6] at the MP2/6-31G\*\* level. The predicted crystal structures were compared with each experimentally determined crystal structure using the feature entitled 'crystal structure similarity' in Mercury 3.3 (CCDC) software. The experimental crystal structure, in this case, the reference crystal structure, is examined and represented by a reference molecule of its 14 closest neighbors. This set of molecules is then searched for predicted crystal structures within the default geometrical tolerances in a distance, being 20% and angles being 20° respectively. This search was configured by ignoring hydrogen atom positions, each atom's hydrogen count and bond type and by allowing molecular differences and structure inversion. 15 molecules of the reference and the predicted crystal structure were matched by the calculation of the overlay and a root-mean-squared deviation (RMSD15) of the atomic positions. Such overlay diagrams for the experimental crystal structure for halogenated benzanilides and the predicted structures for benzanilide are includes in the ESI. It is observed from some of the overlay diagrams that the obtained crystal structures are only found in an extremely distorted way, and some overlay are not found.

1. G. M. Sheldrick, SADABS; Bruker AXS, Inc.: Madison, WI, 2007.
2. A. Altomare, M. C. Burla, G. Camalli, G. Cascarano, C. Giacovazzo, A. Gualardi, G. J. Polidori, *J Appl. Crystallogr.*, 1994, **27**, 435-436.
3. G. M. Sheldrick, *Acta Crystallogr.*, 2008, **A64**, 112-122.
4. L. J. Farrugia, *J Appl. Crystallogr.*, 1999, **32**, 837-838.
5. C. F. Macrae, I. J. Bruno, J. A. Chisholm, P. R. Edgington, P. McCabe, E. Pidcock, L. Rodriguez-Monge, R. Taylor, J. Streek, P. A. Wood, *J Appl. Crystallogr.*, 2008, **41**, 466.
6. M. J. Frisch, G. W. Trucks, H. B. Schlegel, G. E. Scuseria, M. A. Robb, J. R. Cheeseman, G. Scalmani, V. Barone, B. Mennucci, G. A. Petersson, H. Nakatsuji, M. Caricato, X. Li, H. P. Hratchian, A. F. Izmaylov, J. Bloino, G. Zheng, J. L. Sonnenberg, M. Hada, M. Ehara, K. Toyota, R. Fukuda, J. Hasegawa, M. Ishida, T. Nakajima, Y. Honda, O. Kitao, H. Nakai, T. Vreven, J. A. Montgomery Jr., J. E. Peralta, F. Ogliaro, M. Bearpark, J. J. Heyd, E. Brothers, K. N. Kudin, V. N. Staroverov, R. Kobayashi, J. Normand, K. Raghavachari, A. Rendell, J. C. Burant, S. S. Iyengar, J. Tomasi, M. Cossi, N. Rega, J. M. Millam, M. Klene, J. E. Knox, J. B. Cross, V. Bakken, C. Adamo, J. Jaramillo, R. Gomperts, R. E. Stratmann, O. Yazyev, A. J. Austin, R. Cammi, C. Pomelli, J. W. Ochterski, R. L. Martin, K. Morokuma, V. G. Zakrzewski, G. A. Voth, P. Salvador, J. J. Dannenberg, S. Dapprich, A. D. Daniels, O. Farkas, J. B. Foresman, J. V. Ortiz, J. Cioslowski and D. J. Fox, Gaussian 09, Revision A.02, Gaussian, Inc., Wallingford CT, 2009.

T-1: Crystallographic and refinement data

| DATA                                                                  | P0024                                                                       | P0026                                                                       | P0034                                                                       | P0035                                                                       | P2400                                                                       |
|-----------------------------------------------------------------------|-----------------------------------------------------------------------------|-----------------------------------------------------------------------------|-----------------------------------------------------------------------------|-----------------------------------------------------------------------------|-----------------------------------------------------------------------------|
| Formula                                                               | C <sub>13</sub> H <sub>9</sub> F <sub>2</sub> N <sub>1</sub> O <sub>1</sub> | C <sub>13</sub> H <sub>9</sub> F <sub>2</sub> N <sub>1</sub> O <sub>1</sub> | C <sub>13</sub> H <sub>9</sub> F <sub>2</sub> N <sub>1</sub> O <sub>1</sub> | C <sub>13</sub> H <sub>9</sub> F <sub>2</sub> N <sub>1</sub> O <sub>1</sub> | C <sub>13</sub> H <sub>9</sub> F <sub>2</sub> N <sub>1</sub> O <sub>1</sub> |
| CCDC                                                                  | 1407974                                                                     | 1407975                                                                     | 1407976                                                                     | 1407977                                                                     | 1407982                                                                     |
| Solvent                                                               | Dichloromethane and hexane (1 : 2)                                          | Acetone                                                                     | Dichloromethane and hexane (1 : 2)                                          | Dichloromethane and hexane (1 : 2)                                          | Ethyl acetate and hexane (1 : 2)                                            |
| Formula weight                                                        | 233.21                                                                      | 233.21                                                                      | 233.21                                                                      | 233.21                                                                      | 233.21                                                                      |
| Temperature (K)                                                       | 100(5)                                                                      | 100(5)                                                                      | 100(5)                                                                      | 100(5)                                                                      | 100(5)                                                                      |
| Wavelength (Å)                                                        | 0.71073                                                                     | 0.71073                                                                     | 0.71073                                                                     | 0.71073                                                                     | 0.71073                                                                     |
| Crystal system                                                        | Monoclinic                                                                  | Orthorhombic                                                                | Triclinic                                                                   | Triclinic                                                                   | Monoclinic                                                                  |
| Space group, Z                                                        | <i>P</i> 2 <sub>1</sub> / <i>n</i> , 4                                      | <i>Pna</i> 2 <sub>1</sub> , 4                                               | <i>P</i> -1, 2                                                              | <i>P</i> -1, 2                                                              | <i>Pn</i> , 2                                                               |
| a(Å)                                                                  | 5.4223(3)                                                                   | 9.914(4)                                                                    | 5.43850(10)                                                                 | 5.1300(3)                                                                   | 5.535(7)                                                                    |
| b(Å)                                                                  | 7.6977(4)                                                                   | 21.812(9)                                                                   | 7.5939(2)                                                                   | 8.8893(5)                                                                   | 5.035(6)                                                                    |
| c(Å)                                                                  | 25.4353(14)                                                                 | 4.923(2)                                                                    | 12.8178(3)                                                                  | 11.6782(7)                                                                  | 19.29(2)                                                                    |
| α(°), β(°), γ(°)                                                      | 90.00, 92.750(2), 90.00                                                     | 90.00, 90.00, 90.00                                                         | 106.2510(10), 90.2030(10), 100.3370(10)                                     | 101.426(3), 97.174(3), 90.881(3)                                            | 90.00, 92.048(16), 90.00                                                    |
| Volume(Å <sup>3</sup> ), Density(g/cm <sup>3</sup> )                  | 1060.43(10), 1.461                                                          | 1064.4(8), 1.455                                                            | 499.16(2), 1.552                                                            | 517.47(5), 1.497                                                            | 537.3(11)                                                                   |
| F(000), μ(mm <sup>-1</sup> )                                          | 480, 0.117                                                                  | 480, 0.117                                                                  | 240, 0.124                                                                  | 240, 0.120                                                                  | 240, 0.115                                                                  |
| Θ(min, max)                                                           | 2.76, 30.06                                                                 | 2.26, 27.10                                                                 | 1.68, 27.88                                                                 | 1.79, 25.34                                                                 | 2.11, 25.00                                                                 |
| h <sub>min, max</sub> , k <sub>min, max</sub> , l <sub>min, max</sub> | (-7, 7), (-10, 10), (-35, 35)                                               | (-7, 12), (-27, 27), (-6, 6)                                                | (-7, 7), (-9, 9), (-16, 16)                                                 | (-5, 6), (-10, 10), (-14, 14)                                               | (-5, 6), (-5, 5), (-22, 22)                                                 |
| Treatment of Hydrogen                                                 | Fixed                                                                       | Fixed                                                                       | Fixed                                                                       | Fixed                                                                       | Fixed                                                                       |
| No. unique ref./ obs. Ref.                                            | 3104/2447                                                                   | 2270/1910                                                                   | 2372/2226                                                                   | 1877/1741                                                                   | 1740/1402                                                                   |
| No of parameter                                                       | 154                                                                         | 154                                                                         | 154                                                                         | 154                                                                         | 158                                                                         |
| R <sub>all</sub> , R <sub>obs</sub>                                   | 0.0607, 0.0474                                                              | 0.0496, 0.0366                                                              | 0.0383, 0.0365                                                              | 0.0368, 0.0346                                                              | 0.0954, 0.0808                                                              |
| wR <sub>2_all</sub> , wR <sub>2_obs</sub>                             | 0.1370, 0.1273                                                              | 0.0814, 0.0749                                                              | 0.0986, 0.0969                                                              | 0.0976, 0.0950                                                              | 0.2561, 0.231                                                               |
| Δρ <sub>min, max</sub> (eÅ <sup>-3</sup> )                            | -0.191, 0.297                                                               | -0.187, 0.157                                                               | -0.286, 0.313                                                               | 0.189, 0.217                                                                | -0.408, 0.645                                                               |
| G.o.F                                                                 | 1.047                                                                       | 1.036                                                                       | 1.032                                                                       | 1.042                                                                       | 1.097                                                                       |

| DATA           | P2500                                                                       | P3400                                                                       | P3500                                                                       | P2323                                                                       | P2324                                                                       |
|----------------|-----------------------------------------------------------------------------|-----------------------------------------------------------------------------|-----------------------------------------------------------------------------|-----------------------------------------------------------------------------|-----------------------------------------------------------------------------|
| Formula        | C <sub>13</sub> H <sub>9</sub> F <sub>2</sub> N <sub>1</sub> O <sub>1</sub> | C <sub>13</sub> H <sub>9</sub> F <sub>2</sub> N <sub>1</sub> O <sub>1</sub> | C <sub>13</sub> H <sub>9</sub> F <sub>2</sub> N <sub>1</sub> O <sub>1</sub> | C <sub>13</sub> H <sub>7</sub> F <sub>4</sub> N <sub>1</sub> O <sub>1</sub> | C <sub>13</sub> H <sub>7</sub> F <sub>4</sub> N <sub>1</sub> O <sub>1</sub> |
| CCDC           | 1407984                                                                     | 1407985                                                                     | 1407988                                                                     | 1407978                                                                     | 1407979                                                                     |
| Solvent        | Dichloromethane and hexane (1 : 2)                                          | Dichloromethane and hexane (1 : 2)                                          | Chloroform and hexane (1 : 2)                                               | Ethanol                                                                     | Toluene                                                                     |
| Formula weight | 233.21                                                                      | 233.21                                                                      | 233.21                                                                      | 269.20                                                                      | 269.20                                                                      |
| Temperature(K) | 100(5)                                                                      | 100(5)                                                                      | 100(5)                                                                      | 100(5)                                                                      | 100(5)                                                                      |
| Wavelength(Å)  | 0.71073                                                                     | 0.71073                                                                     | 0.71073                                                                     | 0.71073                                                                     | 0.71073                                                                     |
| Crystal system | Orthorhombic                                                                | Triclinic                                                                   | Monoclinic                                                                  | Orthorhombic                                                                | Monoclinic                                                                  |

|                                                                         |                             |                                          |                                      |                                                          |                                      |
|-------------------------------------------------------------------------|-----------------------------|------------------------------------------|--------------------------------------|----------------------------------------------------------|--------------------------------------|
| <b>Space group, Z</b>                                                   | <i>Pca</i> <sub>2</sub> , 4 | <i>P</i> -1, 2                           | <i>P</i> <sub>2</sub> / <i>n</i> , 4 | <i>P</i> <sub>2</sub> <i>1</i> <sub>2</sub> <i>1</i> , 4 | <i>P</i> <sub>2</sub> / <i>n</i> , 4 |
| <b>a(Å)</b>                                                             | 24.3084(10)                 | 5.4838(2)                                | 10.179(10)                           | 5.0295(2)                                                | 9.456(3)                             |
| <b>b(Å)</b>                                                             | 5.0243(2)                   | 7.7928(4)                                | 5.150(5)                             | 8.8380(4)                                                | 4.7786(16)                           |
| <b>c(Å)</b>                                                             | 8.4598(4)                   | 12.6887(6)                               | 20.053(20)                           | 24.4547(9)                                               | 24.253(8)                            |
| <b>α(°), β(°), γ(°)</b>                                                 | 90.00, 90.00,<br>90.00      | 106.682(2),<br>98.8700(10),<br>90.157(2) | 90.00,<br>103.924(12),<br>90.00      | 90.00, 90.00,<br>90.00                                   | 90.00,<br>95.145(4),<br>90.00        |
| <b>Volume(Å<sup>3</sup>),<br/>Density(g/cm<sup>3</sup>)</b>             | 1033.22(8), 1.499           | 512.57(4), 1.511                         | 1020.4(17), 1.518                    | 1087.03(8),<br>1.645                                     | 1091.5(6),<br>1.638                  |
| <b>F(000), μ(mm<sup>-1</sup>)</b>                                       | 480, 0.120                  | 240, 0.121                               | 480, 0.122                           | 544, 0.152                                               | 544, 0.151                           |
| <b>Θ(min, max)</b>                                                      | 1.68, 25.00                 | 2.73, 28.28                              | 4.13, 27.10                          | 2.45, 28.28                                              | 3.37, 27.10                          |
| <b>h<sub>min, max</sub>, k<sub>min, max</sub>, l<sub>min, max</sub></b> | (-27, 21), (-5, 5), (-9, 9) | (-7, 7), (-10, 10), (-16, 16)            | (-11, 13), (-6, 6), (-25, 22)        | (-6, 6), (-11, 11), (-32, 32)                            | (-12, 12), (-6, 6), (-31, 29)        |
| <b>Treatment of Hydrogen</b>                                            | Fixed                       | Fixed                                    | Fixed                                | Fixed                                                    | Fixed                                |
| <b>No. unique ref./ obs. Ref.</b>                                       | 1563/ 1531                  | 2535/2187                                | 2240/2012                            | 2700/2498                                                | 2391/2189                            |
| <b>No of parameter</b>                                                  | 154                         | 154                                      | 154                                  | 172                                                      | 172                                  |
| <b>R<sub>all</sub>, R<sub>obs</sub></b>                                 | 0.0263, 0.0257              | 0.0491, 0.0436                           | 0.0386, 0.0352                       | 0.0489,<br>0.0455                                        | 0.0345, 0.0318                       |
| <b>wR<sub>2</sub><sub>all</sub>, wR<sub>2</sub><sub>obs</sub></b>       | 0.0620, 0.0617              | 0.1255, 0.1207                           | 0.0940, 0.0917                       | 0.1311,<br>0.1285                                        | 0.0838, 0.0816                       |
| <b>Δρ<sub>min, max</sub> (eÅ<sup>-3</sup>)</b>                          | -0.176, 0.119               | -0.209, 0.316                            | -0.236, 0.315                        | -0.238, 0.378                                            | -0.227, 0.304                        |
| <b>G.o.F</b>                                                            | 1.111                       | 1.057                                    | 1.076                                | 1.089                                                    | 1.056                                |

| <b>DATA</b>                                                   | <b>P2334</b>                                                                | <b>P2335</b>                                                                | <b>P2423</b>                                                                | <b>P3423</b>                                                                | <b>P3435</b>                                                                |
|---------------------------------------------------------------|-----------------------------------------------------------------------------|-----------------------------------------------------------------------------|-----------------------------------------------------------------------------|-----------------------------------------------------------------------------|-----------------------------------------------------------------------------|
| <b>Formula</b>                                                | C <sub>13</sub> H <sub>7</sub> F <sub>4</sub> N <sub>1</sub> O <sub>1</sub> | C <sub>13</sub> H <sub>7</sub> F <sub>4</sub> N <sub>1</sub> O <sub>1</sub> | C <sub>13</sub> H <sub>7</sub> F <sub>4</sub> N <sub>1</sub> O <sub>1</sub> | C <sub>13</sub> H <sub>7</sub> F <sub>4</sub> N <sub>1</sub> O <sub>1</sub> | C <sub>13</sub> H <sub>7</sub> F <sub>4</sub> N <sub>1</sub> O <sub>1</sub> |
| <b>CCDC</b>                                                   | 1407980                                                                     | 1407981                                                                     | 1407983                                                                     | 1407986                                                                     | 1407987                                                                     |
| <b>Solvent</b>                                                | Dichloromethane and hexane (1 : 2)                                          | Ethanol                                                                     | Chloroform and hexane (1 : 2)                                               | Dichloromethane and hexane (1 : 2)                                          | Toluene                                                                     |
| <b>Formula weight</b>                                         | 269.20                                                                      | 269.20                                                                      | 269.20                                                                      | 269.20                                                                      | 269.20                                                                      |
| <b>Temperature(K)</b>                                         | 100(5)                                                                      | 100(5)                                                                      | 100(5)                                                                      | 100(5)                                                                      | 100(5)                                                                      |
| <b>Wavelength(Å)</b>                                          | 0.71073                                                                     | 0.71073                                                                     | 0.71073                                                                     | 0.71073                                                                     | 0.71073                                                                     |
| <b>Crystal system</b>                                         | Triclinic                                                                   | Triclinic                                                                   | Monoclinic                                                                  | Monoclinic                                                                  | Monoclinic                                                                  |
| <b>Space group, Z</b>                                         | <i>P</i> -1, 2                                                              | <i>P</i> 1, 1                                                               | <i>P</i> <sub>2</sub> / <i>n</i> , 4                                        | <i>P</i> <sub>2</sub> / <i>n</i> , 4                                        | <i>P</i> <sub>2</sub> / <i>n</i> , 4                                        |
| <b>a(Å)</b>                                                   | 4.9918(2)                                                                   | 4.6457(5)                                                                   | 8.8818(7)                                                                   | 5.1818(16)                                                                  | 4.9514(4)                                                                   |
| <b>b(Å)</b>                                                   | 9.3610(5)                                                                   | 5.0544(5)                                                                   | 4.9233(3)                                                                   | 8.312(3)                                                                    | 8.6873(8)                                                                   |
| <b>c(Å)</b>                                                   | 12.0172(6)                                                                  | 11.8597(13)                                                                 | 24.9499(18)                                                                 | 25.739(10)                                                                  | 25.517(2)                                                                   |
| <b>α(°), β(°), γ(°)</b>                                       | 102.372(2),<br>97.440(2),<br>90.222(2)                                      | 100.967(4),<br>92.076(4),<br>92.987(4)                                      | 90.00,<br>94.162(2), 90.00                                                  | 90.00, 93.172(11),<br>90.00                                                 | 90.00,<br>91.829(3),<br>90.00                                               |
| <b>Volume (Å<sup>3</sup>),<br/>Density (g/cm<sup>3</sup>)</b> | 543.59(5), 1.645                                                            | 272.72(5), 1.639                                                            | 1088.13(13),<br>1.643                                                       | 1106.9(7), 1.615                                                            | 1097.04(17),<br>1.630                                                       |
| <b>F(000), μ(mm<sup>-1</sup>)</b>                             | 272, 0.152                                                                  | 136, 0.151                                                                  | 544, 0.151                                                                  | 544, 0.149                                                                  | 544, 0.150                                                                  |

|                                                  |                               |                             |                               |                               |                               |
|--------------------------------------------------|-------------------------------|-----------------------------|-------------------------------|-------------------------------|-------------------------------|
| $\Theta$ (min, max)                              | 2.52, 28.28                   | 3.50, 26.36                 | 2.38, 27.09                   | 2.58, 26.37                   | 2.48, 26.37                   |
| $h_{\min, \max}, k_{\min, \max}, l_{\min, \max}$ | (-6, 6), (-12, 12), (-16, 16) | (-5, 5), (-6, 6), (-14, 14) | (-11, 11), (-6, 6), (-31, 31) | (-6, 6), (-10, 10), (-32, 32) | (-6, 5), (-10, 10), (-31, 31) |
| Treatment of Hydrogen                            | Fixed                         | Fixed                       | Fixed                         | Fixed                         | Fixed                         |
| No. unique ref./ obs. Ref.                       | 2677/2174                     | 2091/2026                   | 2388/1856                     | 2250/1861                     | 2234/1430                     |
| No of parameter                                  | 172                           | 172                         | 172                           | 172                           | 182                           |
| R_all, R_obs                                     | 0.0516, 0.0410                | 0.0288, 0.0277              | 0.0630, 0.0476                | 0.0511, 0.0411                | 0.1032, 0.0583                |
| wR <sub>2</sub> _all, wR <sub>2</sub> _obs       | 0.1133, 0.1049                | 0.0756, 0.0746              | 0.1375, 0.1275                | 0.1120, 0.1055                | 0.1530, 0.1332                |
| $\Delta\rho_{\min, \max}$ (eÅ <sup>-3</sup> )    | -0.305, 0.240                 | -0.220, 0.289               | -0.240, 0.263                 | -0.214, 0.201                 | -0.234, 0.428                 |
| G.o.F                                            | 1.032                         | 1.059                       | 1.087                         | 1.086                         | 1.057                         |

T-2: Top 100 polymorph predictions for the unsubstituted benzamide.

| Rank | Space group                                     | Cell volume(Å <sup>3</sup> ) | Density(g/ml) | Total energy (kJ/mol) | Length a(Å) | Length b(Å) | Length c(Å) | Angle alpha (°) | Angle beta (°) | Angle gamma (°) |
|------|-------------------------------------------------|------------------------------|---------------|-----------------------|-------------|-------------|-------------|-----------------|----------------|-----------------|
| 1    | <i>P2<sub>1</sub>/c</i>                         | 954.494                      | 1.373         | -171.14               | 16.1999     | 5.2016      | 15.8925     | 90              | 45.458         | 90              |
| 2    | <i>Pca2<sub>1</sub></i>                         | 961.607                      | 1.362         | -170.42               | 24.1870     | 5.1207      | 7.7640      | 90              | 90             | 90              |
| 3    | <i>P2<sub>1</sub>/c</i>                         | 954.009                      | 1.373         | -170.21               | 24.4670     | 7.7394      | 24.6865     | 90              | 168.224        | 90              |
| 4    | <i>P-1</i>                                      | 474.704                      | 1.380         | -170.02               | 5.2174      | 12.4430     | 7.9500      | 71.097          | 88.633         | 76.812          |
| 5    | <i>Pc</i>                                       | 477.488                      | 1.371         | -169.72               | 14.1172     | 5.1911      | 8.0936      | 90              | 126.386        | 90              |
| 6    | <i>Pca2<sub>1</sub></i>                         | 958.811                      | 1.366         | -169.62               | 24.4616     | 5.0704      | 7.7305      | 90              | 90             | 90              |
| 7    | <i>P2<sub>1</sub>/c</i>                         | 953.267                      | 1.374         | -169.44               | 33.1726     | 5.2241      | 27.9410     | 90              | 168.646        | 90              |
| 8    | <i>P2<sub>1</sub>/c</i>                         | 954.454                      | 1.373         | -169.43               | 7.9613      | 5.2161      | 32.8773     | 90              | 135.646        | 90              |
| 9    | <i>Pna2<sub>1</sub></i>                         | 965.714                      | 1.357         | -169.39               | 7.7525      | 24.2944     | 5.1275      | 90              | 90             | 90              |
| 10   | <i>P2<sub>1</sub>/c</i>                         | 969.940                      | 1.351         | -169.29               | 10.1840     | 5.0594      | 24.0695     | 90              | 128.547        | 90              |
| 11   | <i>P-1</i>                                      | 482.492                      | 1.358         | -169.27               | 12.7786     | 5.1159      | 8.4419      | 87.687          | 116.94         | 100.887         |
| 12   | <i>Pc</i>                                       | 484.576                      | 1.352         | -169.26               | 20.6780     | 5.0748      | 19.1652     | 90              | 166.058        | 90              |
| 13   | <i>P2<sub>1</sub>2<sub>1</sub>2<sub>1</sub></i> | 959.833                      | 1.365         | -169.21               | 5.0770      | 36.4098     | 5.1925      | 90              | 90             | 90              |
| 14   | <i>P2<sub>1</sub></i>                           | 479.888                      | 1.365         | -169.10               | 18.1469     | 5.2137      | 5.0922      | 90              | 95.087         | 90              |
| 15   | <i>P2<sub>1</sub>/c</i>                         | 966.337                      | 1.356         | -169.05               | 10.2555     | 5.0893      | 19.0771     | 90              | 103.950        | 90              |
| 16   | <i>P2<sub>1</sub></i>                           | 479.990                      | 1.365         | -168.99               | 11.5293     | 5.2074      | 7.9971      | 90              | 91.352         | 90              |
| 17   | <i>P2<sub>1</sub></i>                           | 485.595                      | 1.349         | -168.98               | 5.1446      | 5.0502      | 19.5477     | 90              | 107.033        | 90              |
| 18   | <i>P2<sub>1</sub>2<sub>1</sub>2<sub>1</sub></i> | 971.967                      | 1.348         | -168.97               | 38.4426     | 5.0556      | 5.0011      | 90              | 90             | 90              |
| 19   | <i>P2<sub>1</sub>/c</i>                         | 964.616                      | 1.358         | -168.96               | 22.7830     | 5.1386      | 24.4269     | 90              | 160.287        | 90              |
| 20   | <i>C2/c</i>                                     | 1929.06                      | 1.358         | -168.92               | 60.5128     | 5.1375      | 55.5217     | 90              | 173.583        | 90              |
| 21   | <i>P-1</i>                                      | 484.736                      | 1.351         | -168.89               | 11.4615     | 8.2735      | 9.6178      | 147.83          | 91.170         | 87.345          |
| 22   | <i>P2<sub>1</sub>2<sub>1</sub>2<sub>1</sub></i> | 971.679                      | 1.348         | -168.88               | 5.0554      | 37.0229     | 5.1915      | 90              | 90             | 90              |
| 23   | <i>Pna2<sub>1</sub></i>                         | 966.803                      | 1.355         | -168.83               | 9.5515      | 20.1345     | 5.0272      | 90              | 90             | 90              |
| 24   | <i>Pc</i>                                       | 485.235                      | 1.350         | -168.83               | 5.1364      | 5.0638      | 19.4999     | 90              | 106.918        | 90              |
| 25   | <i>P2<sub>1</sub>/c</i>                         | 968.413                      | 1.353         | -168.80               | 5.1834      | 24.0376     | 9.3948      | 90              | 124.176        | 90              |
| 26   | <i>P2<sub>1</sub></i>                           | 486.837                      | 1.346         | -168.74               | 5.0589      | 5.0582      | 20.1825     | 90              | 70.501         | 90              |

|    |                                                              |          |       |         |         |         |         |        |         |         |
|----|--------------------------------------------------------------|----------|-------|---------|---------|---------|---------|--------|---------|---------|
| 27 | <i>P</i> -1                                                  | 482.295  | 1.358 | -168.69 | 5.1929  | 19.3374 | 9.2578  | 44.421 | 56.422  | 82.602  |
| 28 | <i>C</i> <sub>2</sub> / <i>c</i>                             | 1929.921 | 1.358 | -168.56 | 46.6220 | 5.1594  | 46.0668 | 90     | 169.97  | 90      |
| 29 | <i>P</i> <sub>2</sub> / <i>c</i>                             | 966.069  | 1.356 | -168.56 | 26.2238 | 7.7800  | 24.7127 | 90     | 168.953 | 90      |
| 30 | <i>P</i> <sub>2</sub> / <i>c</i>                             | 966.165  | 1.356 | -168.50 | 24.1041 | 7.7651  | 24.6051 | 90     | 167.89  | 90      |
| 31 | <i>P</i> <sub>2</sub> / <i>c</i>                             | 957.975  | 1.368 | -168.37 | 18.5983 | 5.1814  | 17.9417 | 90     | 146.352 | 90      |
| 32 | <i>P</i> <sub><i>c</i></sub>                                 | 482.096  | 1.359 | -168.28 | 21.3662 | 5.0779  | 19.2742 | 90     | 166.671 | 90      |
| 33 | <i>C</i> <sub>2</sub> / <i>c</i>                             | 1935.125 | 1.354 | -168.26 | 43.5323 | 5.1658  | 15.9098 | 90     | 147.257 | 90      |
| 34 | <i>P</i> <sub><i>c</i></sub>                                 | 482.129  | 1.359 | -168.19 | 18.4531 | 5.2236  | 20.0364 | 90     | 165.544 | 90      |
| 35 | <i>P</i> <sub>2</sub> / <i>c</i>                             | 967.239  | 1.354 | -168.10 | 5.0569  | 9.3604  | 20.8657 | 90     | 101.673 | 90      |
| 36 | <i>P</i> <sub>2</sub> / <i>c</i>                             | 971.640  | 1.348 | -168.08 | 33.3383 | 5.0958  | 28.5819 | 90     | 168.457 | 90      |
| 37 | <i>P</i> <sub>2</sub> / <i>c</i>                             | 966.478  | 1.356 | -168.03 | 12.6508 | 14.9558 | 12.7187 | 90     | 156.32  | 90      |
| 38 | <i>C</i> <sub>2</sub> / <i>c</i>                             | 1953.159 | 1.341 | -167.85 | 25.6613 | 5.0537  | 17.8008 | 90     | 122.211 | 90      |
| 39 | <i>Pca</i> <sub>2</sub> <sub>1</sub>                         | 969.636  | 1.351 | -167.83 | 24.5342 | 5.1706  | 7.6436  | 90     | 90      | 90      |
| 40 | <i>P</i> <sub>2</sub> / <i>c</i>                             | 948.579  | 1.381 | -167.72 | 22.0814 | 8.4100  | 22.3774 | 90     | 166.837 | 90      |
| 41 | <i>P</i> <sub>2</sub> <sub>1</sub>                           | 479.647  | 1.366 | -167.71 | 12.7151 | 7.7409  | 5.0678  | 90     | 105.929 | 90      |
| 42 | <i>Pna</i> <sub>2</sub> <sub>1</sub>                         | 971.664  | 1.348 | -167.68 | 7.6413  | 24.5927 | 5.1706  | 90     | 90      | 90      |
| 43 | <i>P</i> <sub>2</sub> / <i>c</i>                             | 973.597  | 1.346 | -167.66 | 10.8480 | 5.0281  | 24.7637 | 90     | 133.879 | 90      |
| 44 | <i>Pna</i> <sub>2</sub> <sub>1</sub>                         | 978.479  | 1.339 | -167.59 | 16.3176 | 11.5668 | 5.1842  | 90     | 90      | 90      |
| 45 | <i>P</i> <sub>2</sub> / <i>c</i>                             | 968.598  | 1.353 | -167.57 | 31.1888 | 5.1134  | 23.5697 | 90     | 165.068 | 90      |
| 46 | <i>P</i> <sub>2</sub> <sub>1</sub>                           | 485.22   | 1.350 | -167.54 | 32.4342 | 5.0586  | 5.2255  | 90     | 145.532 | 90      |
| 47 | <i>Pna</i> <sub>2</sub> <sub>1</sub>                         | 968.531  | 1.353 | -167.54 | 23.8276 | 7.7926  | 5.2162  | 90     | 90      | 90      |
| 48 | <i>P</i> <sub>2</sub> / <i>c</i>                             | 962.219  | 1.362 | -167.47 | 8.2080  | 5.0964  | 24.8584 | 90     | 67.719  | 90      |
| 49 | <i>P</i> <sub>2</sub> / <i>c</i>                             | 963.572  | 1.360 | -167.47 | 7.6630  | 5.0925  | 28.3740 | 90     | 60.485  | 90      |
| 50 | <i>Pca</i> <sub>2</sub> <sub>1</sub>                         | 967.239  | 1.354 | -167.46 | 7.8896  | 5.1992  | 23.5801 | 90     | 90      | 90      |
| 51 | <i>P</i> <sub>2</sub> <sub>1</sub> <sub>2</sub> <sub>1</sub> | 970.572  | 1.350 | -167.43 | 36.4440 | 5.0724  | 5.2503  | 90     | 90      | 90      |
| 52 | <i>Pca</i> <sub>2</sub> <sub>1</sub>                         | 971.270  | 1.349 | -167.41 | 24.2114 | 5.0935  | 7.8759  | 90     | 90      | 90      |
| 53 | <i>Pna</i> <sub>2</sub> <sub>1</sub>                         | 961.951  | 1.362 | -167.41 | 7.6432  | 24.6853 | 5.0985  | 90     | 90      | 90      |
| 54 | <i>P</i> <sub>2</sub> / <i>c</i>                             | 977.156  | 1.340 | -167.33 | 22.5810 | 5.0972  | 8.5309  | 90     | 95.63   | 90      |
| 55 | <i>P</i> -1                                                  | 484.523  | 1.352 | -167.21 | 7.8754  | 15.9263 | 5.1752  | 112.76 | 90.818  | 122.395 |
| 56 | <i>P</i> <sub>2</sub> / <i>c</i>                             | 966.108  | 1.356 | -167.20 | 26.8729 | 5.0981  | 15.2752 | 90     | 152.506 | 90      |
| 57 | <i>P</i> <sub>2</sub> / <i>c</i>                             | 969.296  | 1.352 | -167.18 | 8.4499  | 5.1102  | 34.0594 | 90     | 138.77  | 90      |
| 58 | <i>Pna</i> <sub>2</sub> <sub>1</sub>                         | 971.598  | 1.348 | -167.13 | 7.9285  | 24.0912 | 5.0867  | 90     | 90      | 90      |
| 59 | <i>P</i> -1                                                  | 484.487  | 1.352 | -167.00 | 5.1543  | 9.3964  | 15.0173 | 55.276 | 79.196  | 55.743  |
| 60 | <i>P</i> <sub>2</sub> <sub>1</sub>                           | 489.072  | 1.339 | -166.99 | 8.5499  | 5.0887  | 11.3400 | 90     | 82.425  | 90      |
| 61 | <i>C</i> <sub>2</sub> / <i>c</i>                             | 1919.581 | 1.365 | -166.87 | 31.1754 | 5.2309  | 22.0437 | 90     | 147.724 | 90      |
| 62 | <i>P</i> <sub>2</sub> / <i>c</i>                             | 967.197  | 1.355 | -166.85 | 24.6617 | 5.2586  | 27.7539 | 90     | 164.412 | 90      |
| 63 | <i>P</i> <sub>2</sub> / <i>c</i>                             | 973.206  | 1.346 | -166.80 | 7.8105  | 23.9631 | 9.3541  | 90     | 146.229 | 90      |
| 64 | <i>P</i> <sub>2</sub> / <i>c</i>                             | 968.779  | 1.352 | -166.75 | 5.0772  | 5.1093  | 37.4772 | 90     | 94.806  | 90      |
| 65 | <i>P</i> <sub>2</sub> / <i>c</i>                             | 971.331  | 1.349 | -166.74 | 9.4122  | 5.0756  | 21.0410 | 90     | 75.09   | 90      |
| 66 | <i>P</i> <sub>2</sub> / <i>c</i>                             | 972.410  | 1.347 | -166.67 | 5.1682  | 24.2892 | 12.9274 | 90     | 143.186 | 90      |
| 67 | <i>P</i> <sub>2</sub> <sub>1</sub>                           | 488.953  | 1.340 | -166.60 | 4.8849  | 19.8286 | 5.0731  | 90     | 95.698  | 90      |
| 68 | <i>P</i> <sub>2</sub> <sub>1</sub> <sub>2</sub> <sub>1</sub> | 982.801  | 1.333 | -166.54 | 22.4904 | 5.1591  | 8.4702  | 90     | 90      | 90      |

|     |              |          |       |         |         |         |         |        |         |         |
|-----|--------------|----------|-------|---------|---------|---------|---------|--------|---------|---------|
| 69  | $P2_12_12_1$ | 980.316  | 1.336 | -166.53 | 16.6725 | 11.4901 | 5.1173  | 90     | 90      | 90      |
| 70  | $C2/c$       | 1951.697 | 1.343 | -166.42 | 25.1674 | 5.1064  | 36.3787 | 90     | 155.326 | 90      |
| 71  | $P2_1/c$     | 979.925  | 1.337 | -166.39 | 22.9563 | 8.2886  | 23.4574 | 90     | 167.318 | 90      |
| 72  | $Pna2_1$     | 983.333  | 1.332 | -166.39 | 14.0085 | 13.8821 | 5.0565  | 90     | 90      | 90      |
| 73  | $P1$         | 241.129  | 1.358 | -166.37 | 11.2906 | 6.5612  | 4.5137  | 129.66 | 103.489 | 69.533  |
| 74  | $P2_1/c$     | 975.673  | 1.343 | -166.32 | 23.0181 | 5.0928  | 31.4500 | 90     | 164.654 | 90      |
| 75  | $P2_1/c$     | 968.459  | 1.353 | -166.31 | 12.4225 | 15.2275 | 5.2350  | 90     | 77.952  | 90      |
| 76  | $Pc$         | 486.787  | 1.346 | -166.31 | 11.8101 | 5.1918  | 7.9391  | 90     | 90.114  | 90      |
| 77  | $P2_12_12_1$ | 969.425  | 1.351 | -166.23 | 23.8894 | 5.2137  | 7.7833  | 90     | 90      | 90      |
| 78  | $P2_1/c$     | 978.664  | 1.339 | -166.23 | 39.1501 | 7.7547  | 43.3093 | 90     | 175.731 | 90      |
| 79  | $C2/c$       | 1957.707 | 1.338 | -166.23 | 46.3304 | 5.1434  | 47.4392 | 90     | 170.027 | 90      |
| 80  | $P2_1/c$     | 975.151  | 1.343 | -166.22 | 5.1427  | 5.0666  | 38.9831 | 90     | 73.748  | 90      |
| 81  | $Pna2_1$     | 981.815  | 1.334 | -166.20 | 16.1764 | 11.8071 | 5.1405  | 90     | 90      | 90      |
| 82  | $P2_12_12_1$ | 993.803  | 1.318 | -166.15 | 11.6521 | 5.1798  | 16.4658 | 90     | 90      | 90      |
| 83  | $P2_1/c$     | 976.827  | 1.341 | -166.13 | 12.7311 | 15.0266 | 14.5171 | 90     | 159.407 | 90      |
| 84  | $P2_1/c$     | 985.789  | 1.329 | -166.13 | 28.5462 | 5.0553  | 38.9868 | 90     | 169.909 | 90      |
| 85  | $P-1$        | 487.899  | 1.343 | -166.13 | 12.7014 | 12.3689 | 5.0493  | 117.51 | 107.902 | 115.843 |
| 86  | $Pna2_1$     | 977.183  | 1.341 | -166.02 | 7.7789  | 24.3000 | 5.1695  | 90     | 90      | 90      |
| 87  | $P2_1$       | 490.01   | 1.337 | -166.01 | 12.5719 | 7.7769  | 5.1463  | 90     | 76.87   | 90      |
| 88  | $P2_1/c$     | 974.797  | 1.344 | -166.00 | 5.0360  | 7.8746  | 25.3111 | 90     | 103.795 | 90      |
| 89  | $C2/c$       | 1966.379 | 1.332 | -166.00 | 34.9889 | 5.2005  | 15.8439 | 90     | 136.994 | 90      |
| 90  | $P2_1/c$     | 986.919  | 1.327 | -166.00 | 8.3407  | 23.1247 | 5.1195  | 90     | 88.13   | 90      |
| 91  | $Pc$         | 487.661  | 1.343 | -166.00 | 10.9554 | 5.0646  | 8.9738  | 90     | 101.641 | 90      |
| 92  | $P2_1/c$     | 979.632  | 1.337 | -165.98 | 5.1582  | 16.4974 | 11.9000 | 90     | 104.671 | 90      |
| 93  | $P2_1/c$     | 970.494  | 1.350 | -165.94 | 8.08530 | 5.0688  | 26.2110 | 90     | 115.382 | 90      |
| 94  | $C2/c$       | 1955.338 | 1.340 | -165.90 | 39.9300 | 5.1290  | 24.7728 | 90     | 157.331 | 90      |
| 95  | $P2_1/c$     | 972.779  | 1.347 | -165.90 | 28.0126 | 5.1194  | 8.5908  | 90     | 127.85  | 90      |
| 96  | $C2/c$       | 1964.331 | 1.334 | -165.98 | 54.1981 | 5.1626  | 50.6085 | 90     | 172.026 | 90      |
| 97  | $Pna2_1$     | 980.669  | 1.336 | -165.88 | 5.0753  | 37.3935 | 5.1673  | 90     | 90      | 90      |
| 98  | $Pna2_1$     | 983.093  | 1.333 | -165.84 | 8.1693  | 23.4888 | 5.1233  | 90     | 90      | 90      |
| 99  | $Pna2_1$     | 984.443  | 1.331 | -165.80 | 24.4904 | 5.1639  | 7.7843  | 90     | 90      | 90      |
| 100 | $P2_12_12_1$ | 981.967  | 1.334 | -165.80 | 24.3438 | 5.1733  | 7.7973  | 90     | 90      | 90      |

F-1: Molecular diagram of the experimental structures depicting the atomic connectivity.

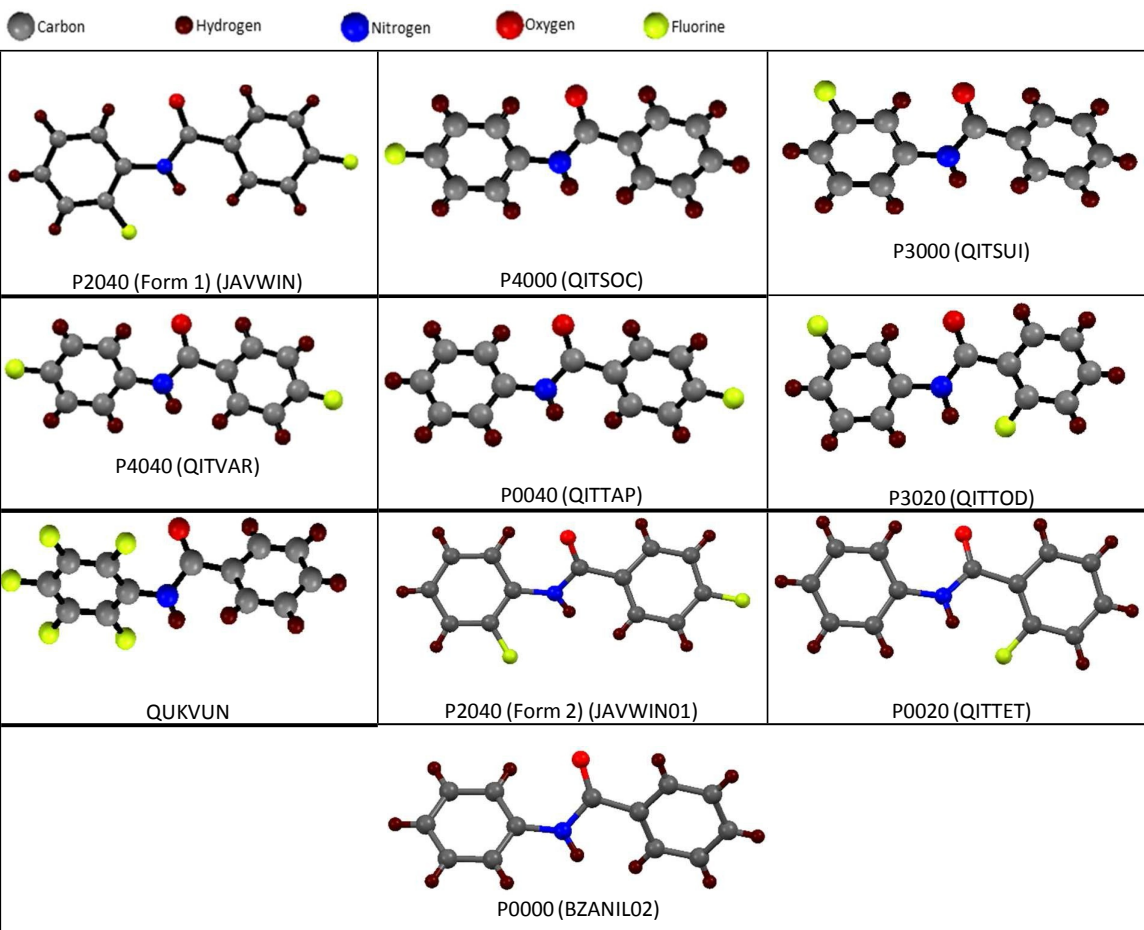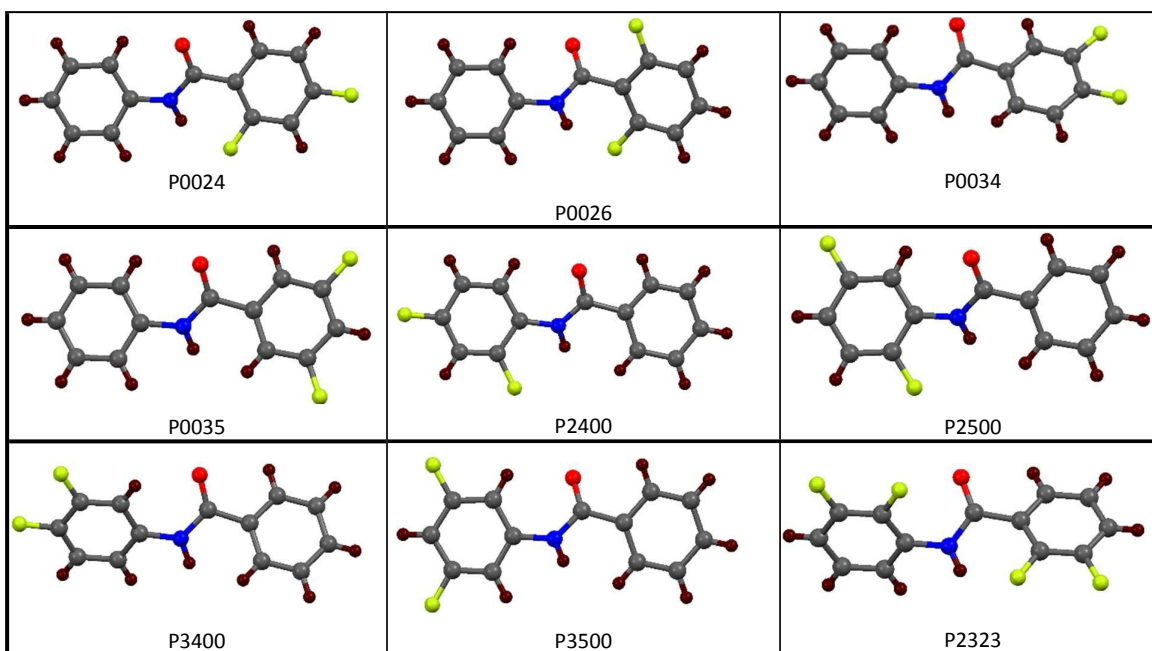



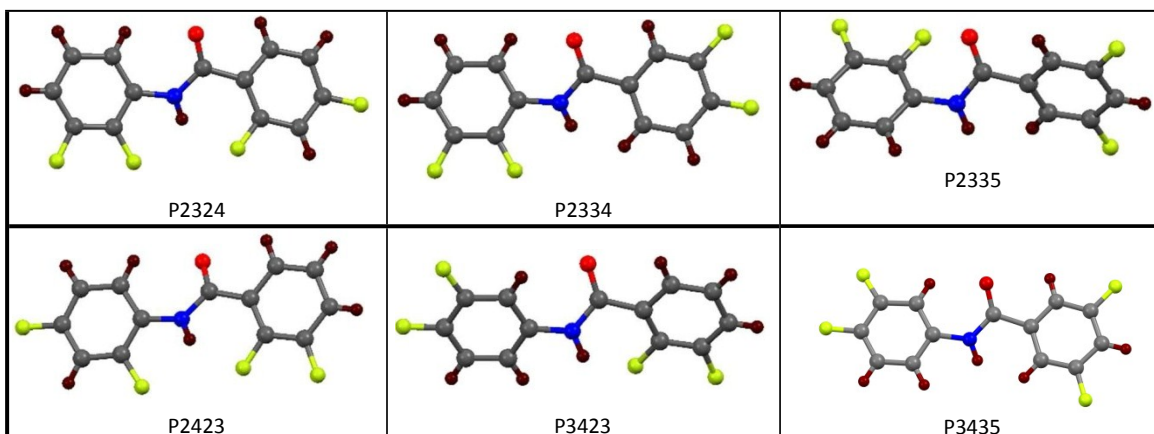

**F-2:** Overlay diagrams for the experimentally (green) obtained fluoro-substituted benzanilides and predicted (purple) structure of unsubstituted benzanilide.

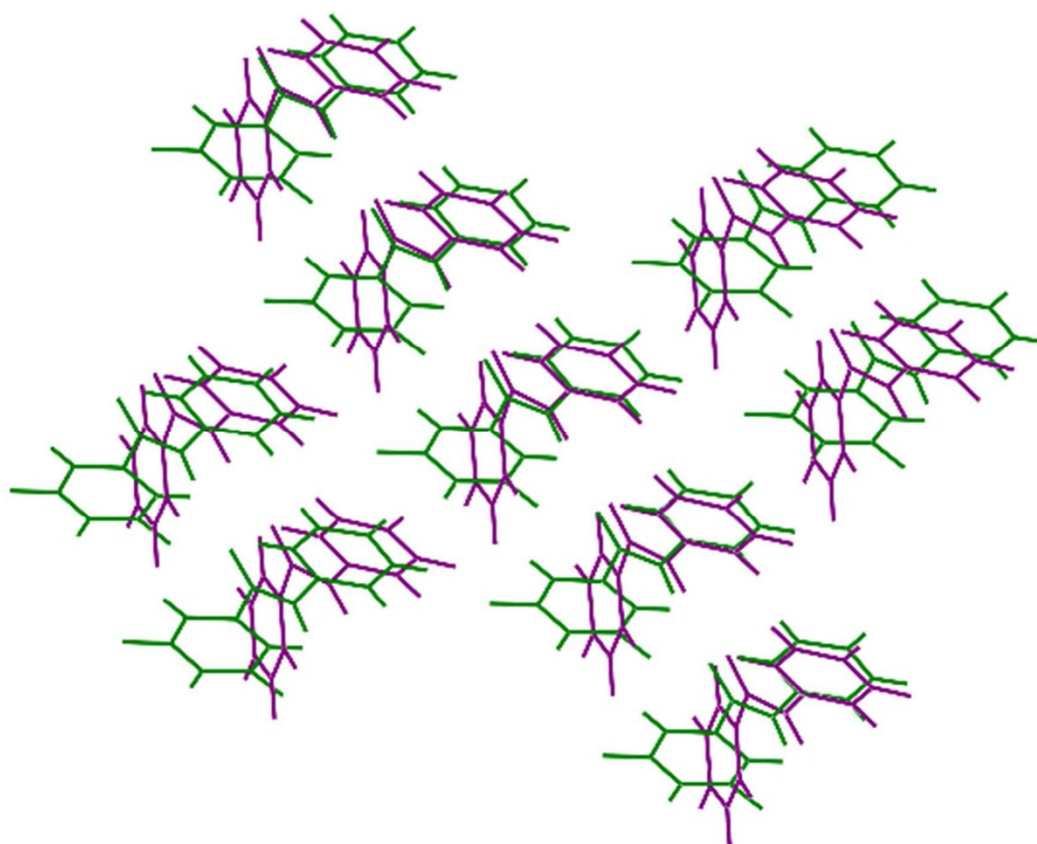

**F-2(a):** Overlay diagram of **P0035** and 4<sup>th</sup> rank structure depicting 9 out of 15 molecules with an RMS deviation of 0.929Å.

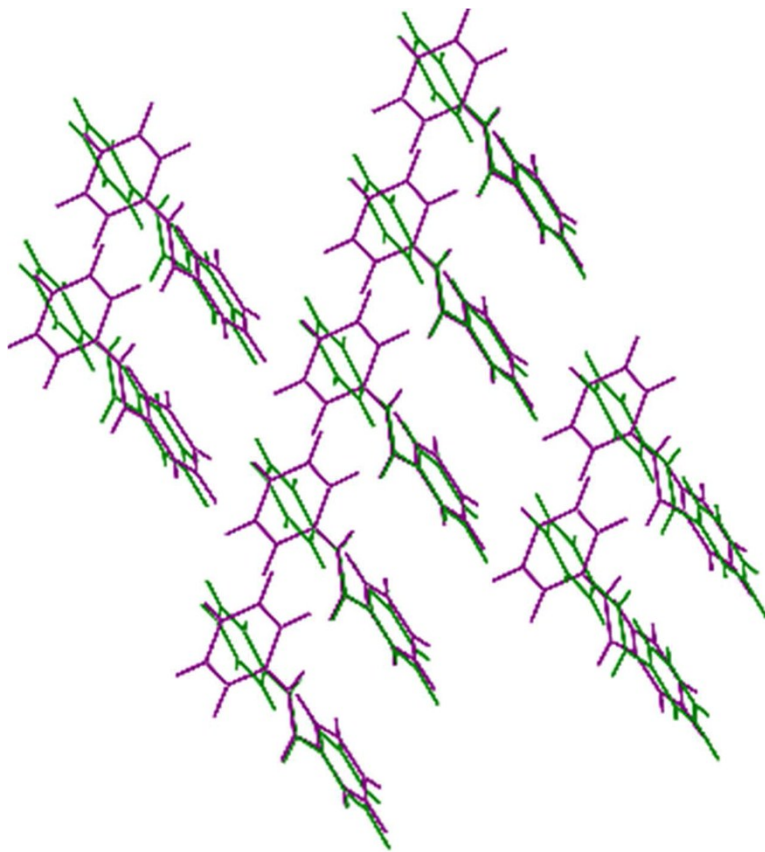

**F-2(b):** Overlay diagram of **P0035** and 11<sup>th</sup> rank structure depicting 9 out of 15 molecules with an RMS deviation of 0.845Å.

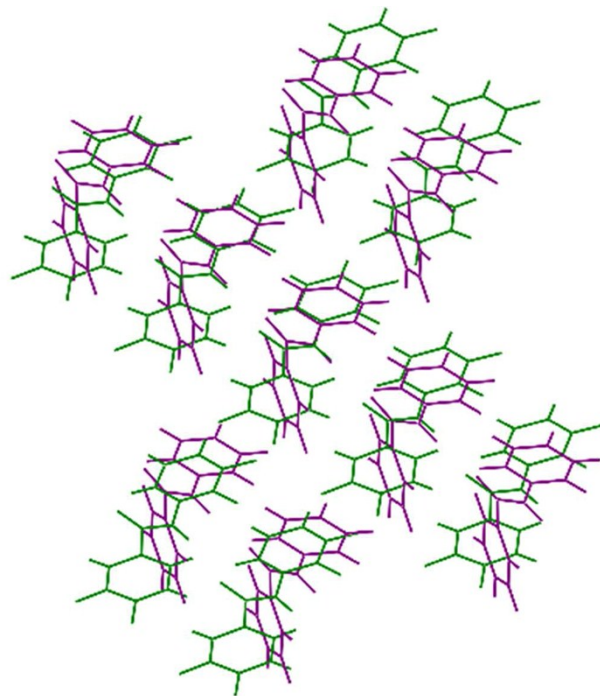

**F-2(c):** Overlay diagram of **P2334** and 4<sup>th</sup> rank structure depicting 9 out of 15 molecules with an RMS deviation of 1.226Å.

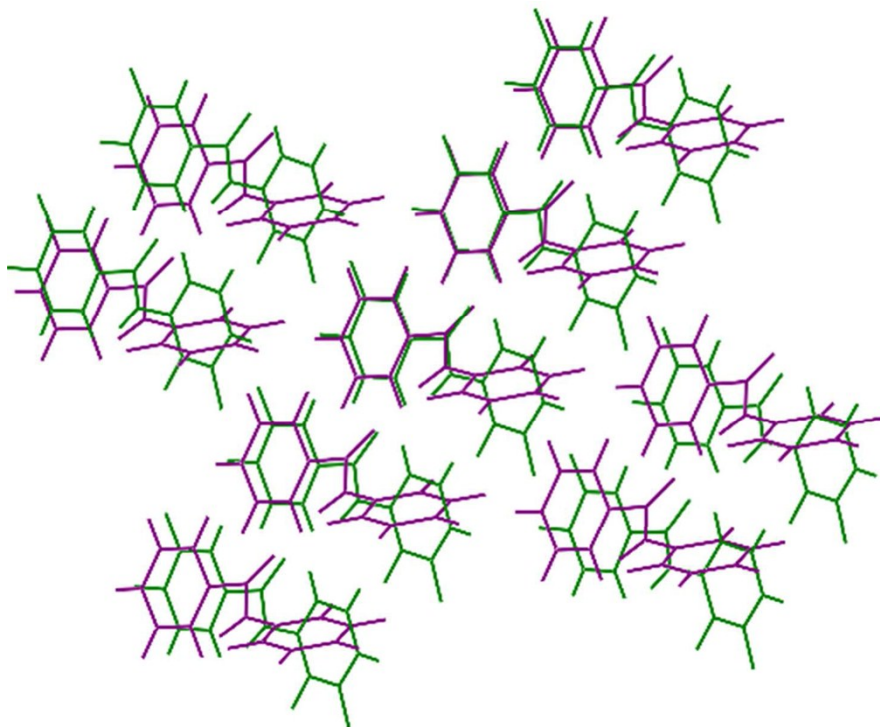

**F-2(d):** Overlay diagram of **P2334** and 11<sup>th</sup> rank structure depicting 9 out of 15 molecules with an RMS deviation of 0.804Å.

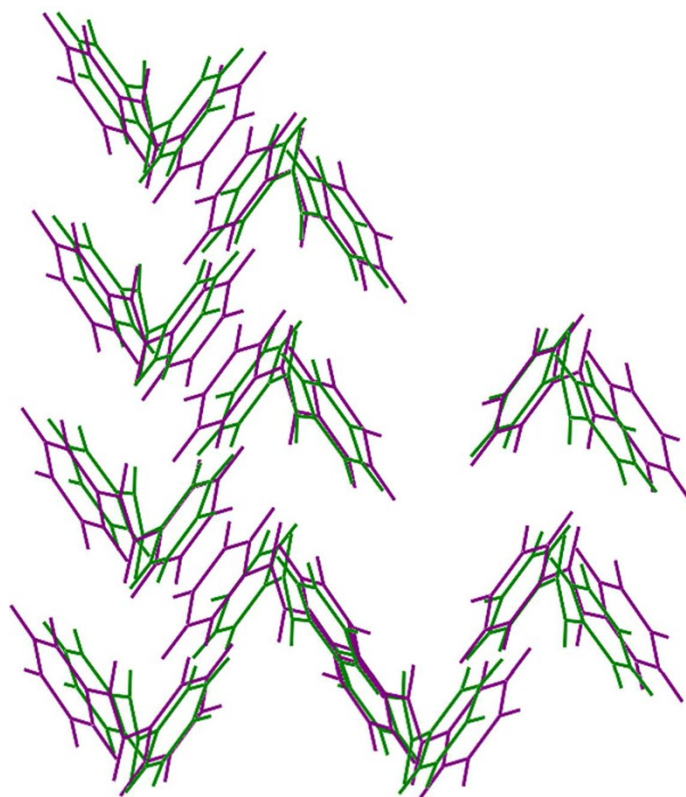

**F-2(e):** Overlay diagram of **P0040** and 4<sup>th</sup> rank structure depicting 10 out of 15 molecules with an RMS deviation of 0.698Å.

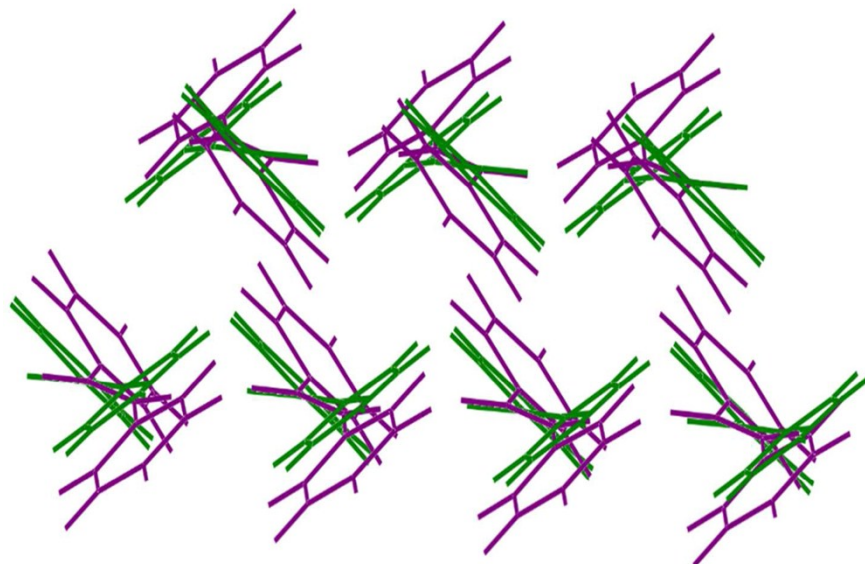

F-2(f): Overlay diagram of **P4000** and 11<sup>th</sup> rank structure depicting 7 out of 15 molecules with an RMS deviation of 1.003Å.

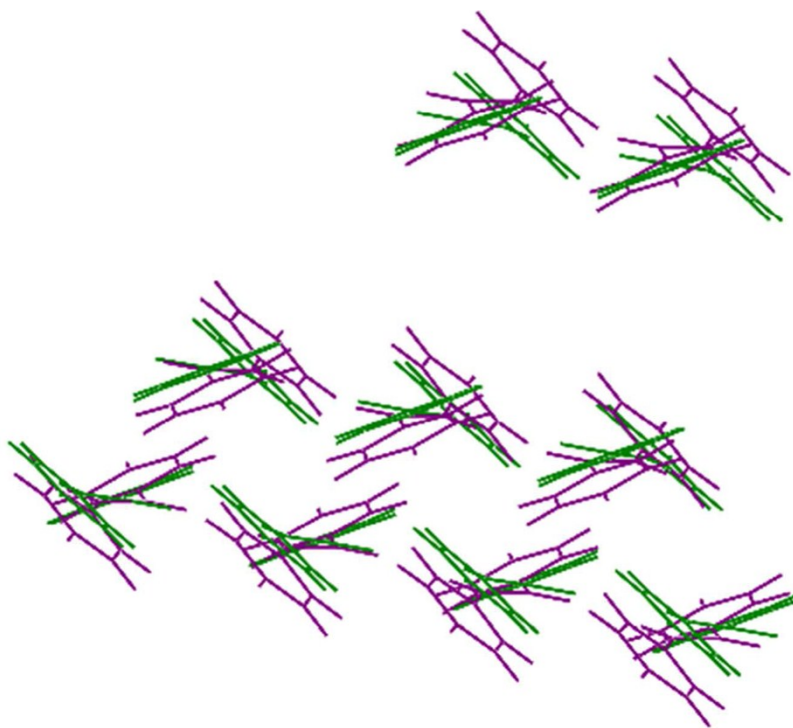

F-2(g): Overlay diagram of **P0040** and 11<sup>th</sup> rank structure depicting 9 out of 15 molecules with an RMS deviation of 0.925Å.



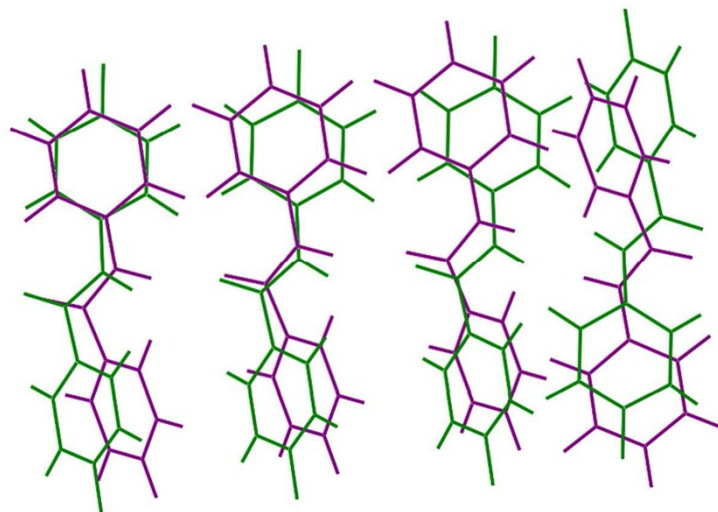

**F-2(h):** Overlay diagram of **P4040** and 11<sup>th</sup> rank structure depicting 4 out of 15 molecules with an RMS deviation of 0.832Å.

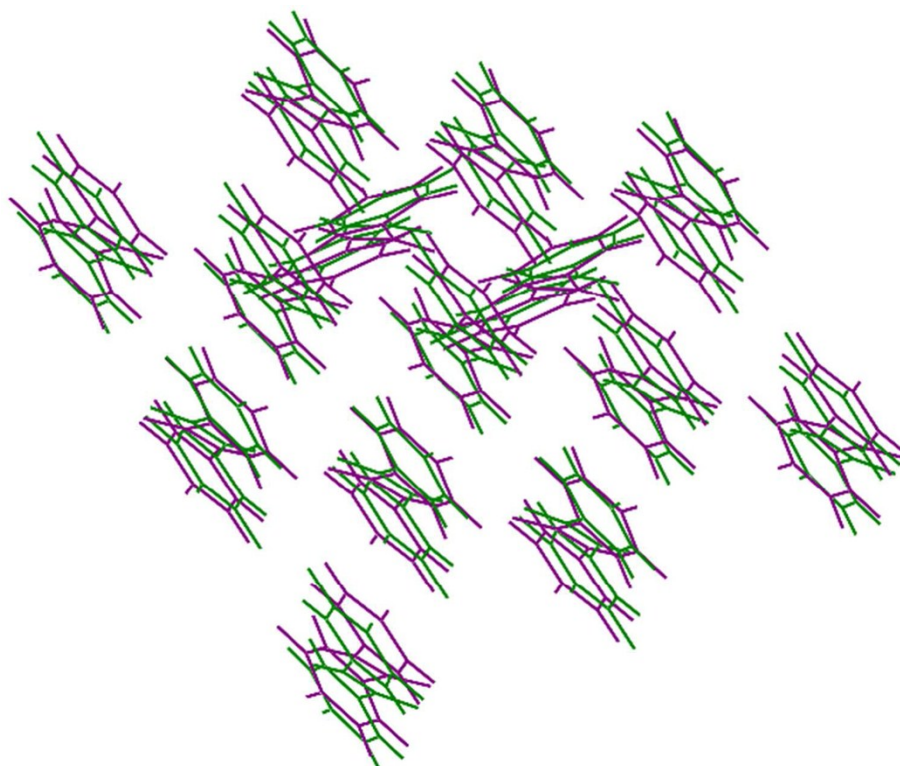

**F-2(i):** Overlay diagram of **P3500** and 15<sup>th</sup> rank structure depicting 14 out of 15 molecules with an RMS deviation of 0.927Å.

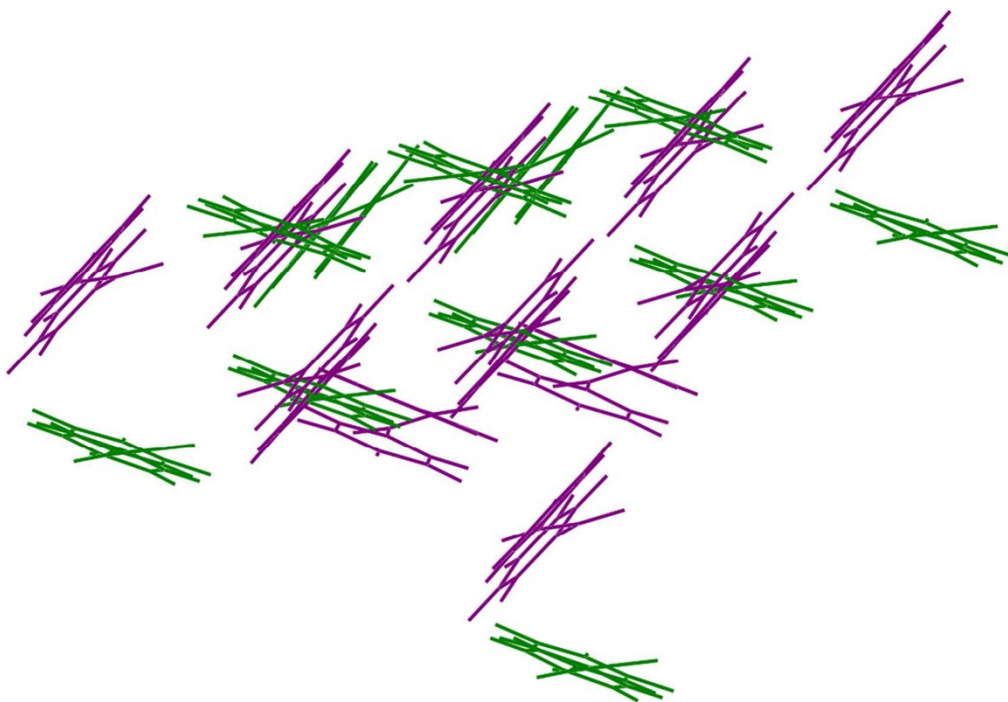

F-2(j): Overlay diagram of **P3500** and 65<sup>th</sup> rank structure depicting 11 out of 15 molecules with an RMS deviation of 4.277Å.

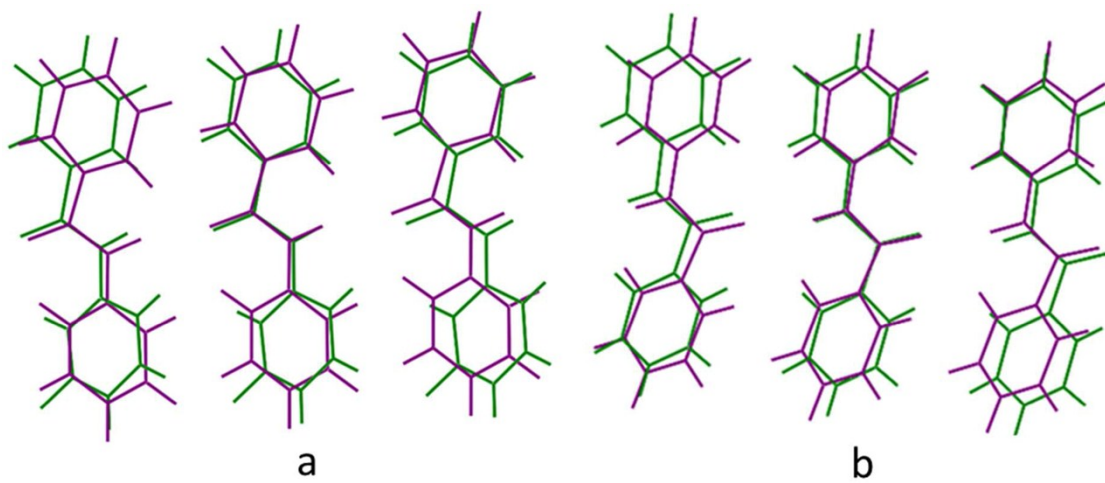

F-2(k): Overlay diagram of **P3000** with a) 48<sup>th</sup> rank structure depicting 3 out of 15 with an RMS deviation of 0.683Å. b) 93<sup>rd</sup> rank structure depicting 3 out of 15 with an RMS deviation of 0.731Å.

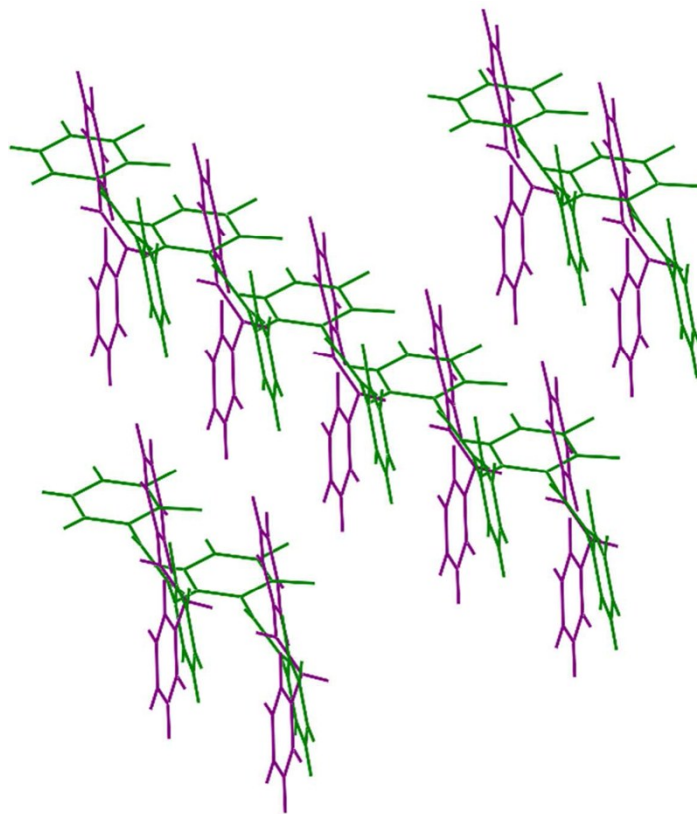

F-2(l): Overlay diagram of **P2323** and 68<sup>th</sup> rank structure depicting 9 out of 15 with an RMS deviation of 1.505Å.

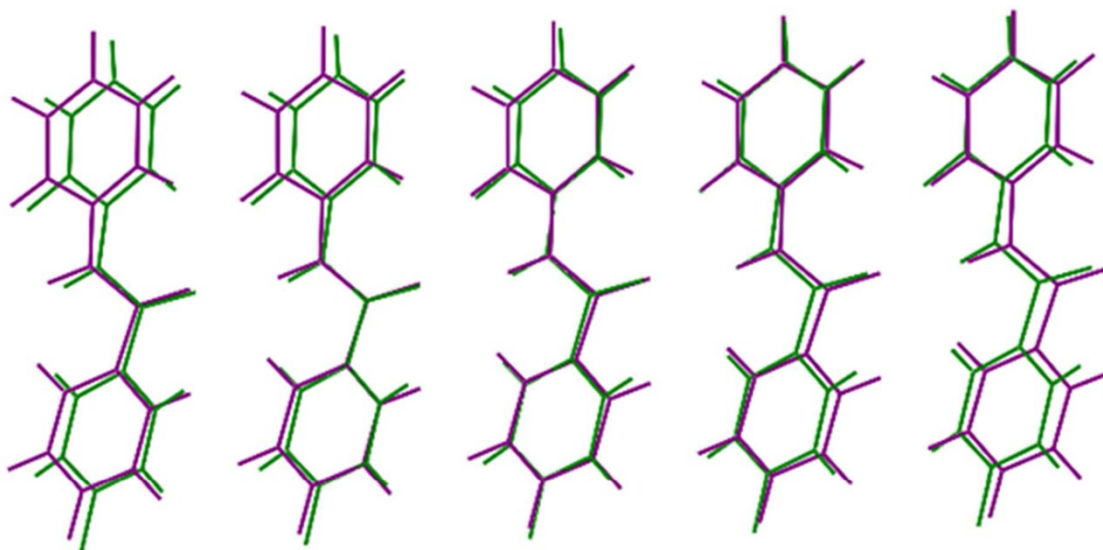

F-2(m): Overlay diagram of **P2040 (Form 2)** and 48<sup>th</sup> rank structure depicting 5 out of 15 with an RMS deviation of 0.25Å.

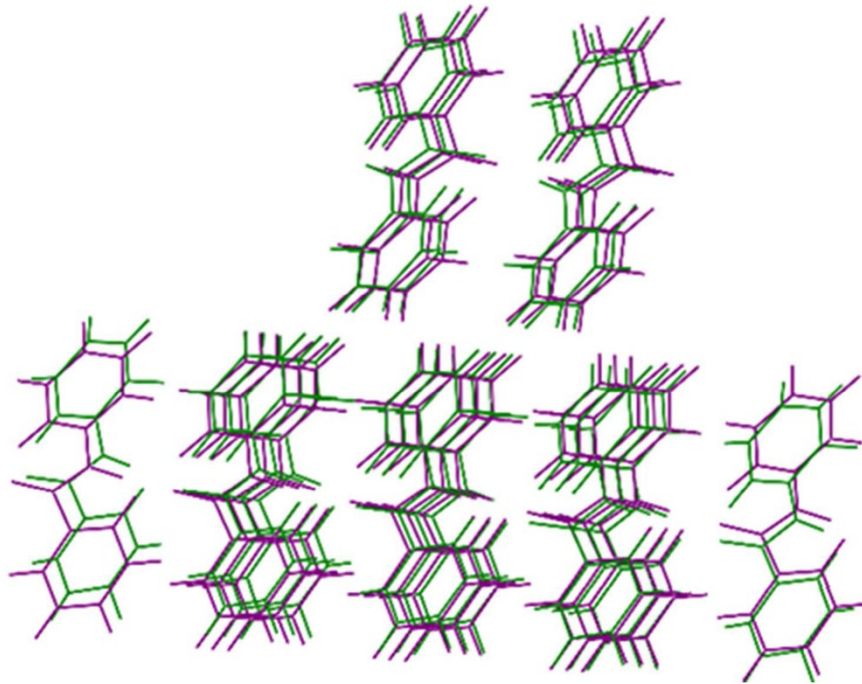

**F-2(n):** Overlay diagram of **P2040 (Form 2)** and 26<sup>th</sup> rank structure depicting 15 out of 15 with an RMS deviation of 0.418Å.

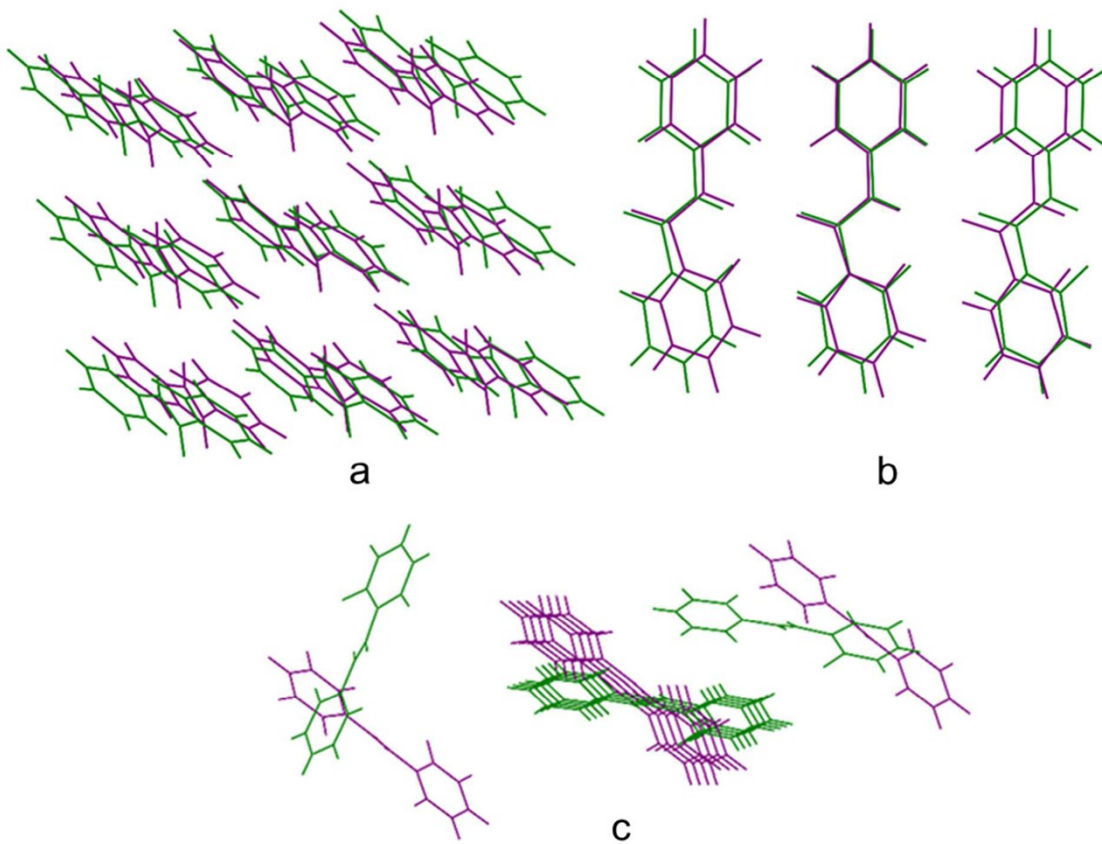

**F-2(o):** Overlay diagram of **P0020** with a) 14<sup>th</sup> rank structure depicting 9 out of 15 with an RMS deviation of 1.026Å. b) 17<sup>th</sup> rank structure 3 out of 15 with an RMS deviation of 0.379Å. c) 26<sup>th</sup> rank structure depicting 6 out of 15 with an RMS deviation 3.497Å.



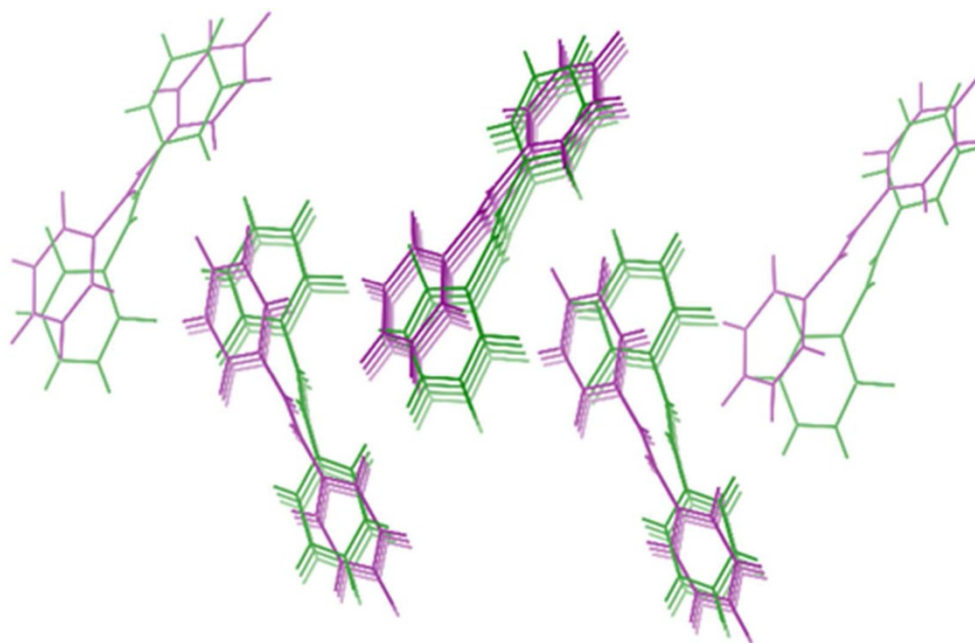

**F-2(p):** Overlay diagram of **P0026** and 23<sup>rd</sup> rank structure depicting 12 out of 15 with an RMS deviation of 0.862Å.

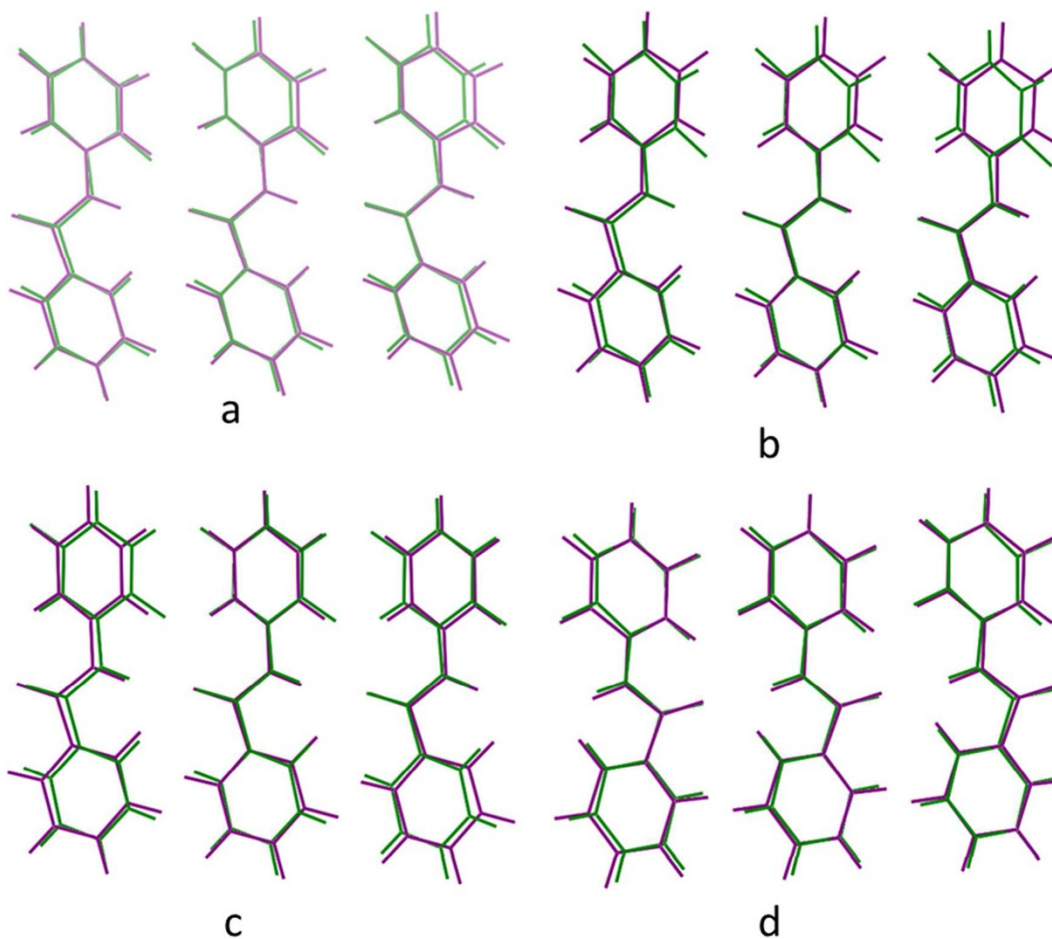

**F-2(q):** Overlay diagram of **P2500** with a) 2<sup>nd</sup> rank structure depicting 3 out of 15 with an RMS deviation of 0.152Å. b) 39<sup>th</sup> rank structure depicting 3 out of 15 with an RMS deviation of 0.384Å. c) 50<sup>th</sup> rank structure depicting 3 out of 15 with an RMS deviation of 0.399Å. d) 52<sup>nd</sup> rank structure depicting 3 out of 15 with an RMS deviation of 0.165Å.

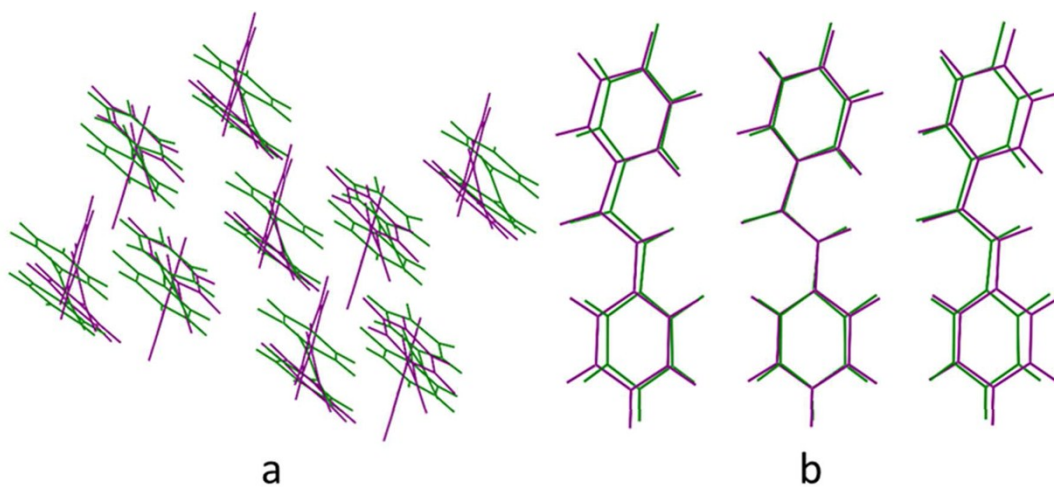

**F-2(r):** Overlay diagram of **P2040 (Form 1)** with a) 39<sup>th</sup> rank structure depicting 9 out of 15 with an RMS deviation of 1.06Å. b) 50<sup>th</sup> rank structure depicting 3 out of 15 with an RMS deviation of 0.692Å.

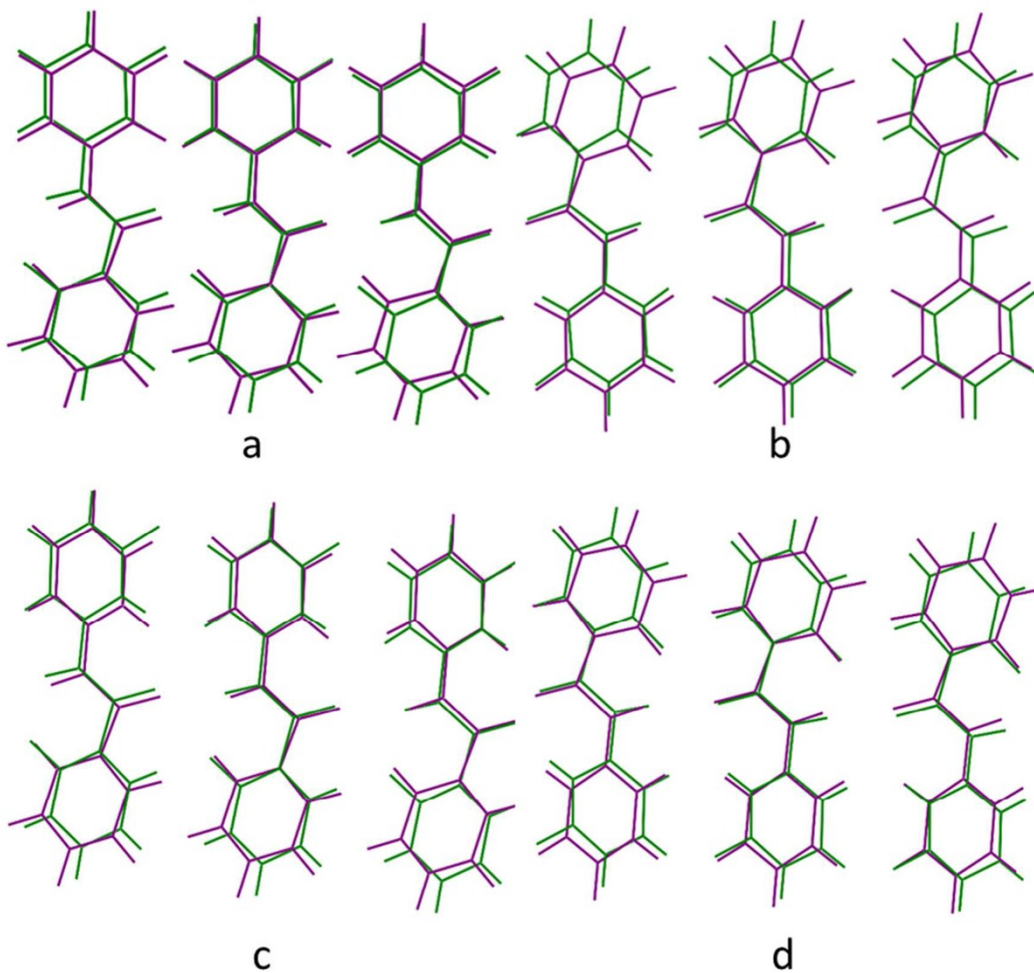

**F-2(s):** Overlay diagram of **P3020** with a) 2<sup>nd</sup> rank structure depicting 3 out of 15 with an RMS deviation of 0.272Å. b) 6<sup>th</sup> rank structure depicting 3 out of 15 with an RMS deviation of 0.378Å. c) 39<sup>th</sup> rank structure depicting 3 out of 15 with an RMS deviation of 0.652Å. d) 50<sup>nd</sup> rank structure depicting 3 out of 15 with an RMS deviation of 0.674Å.

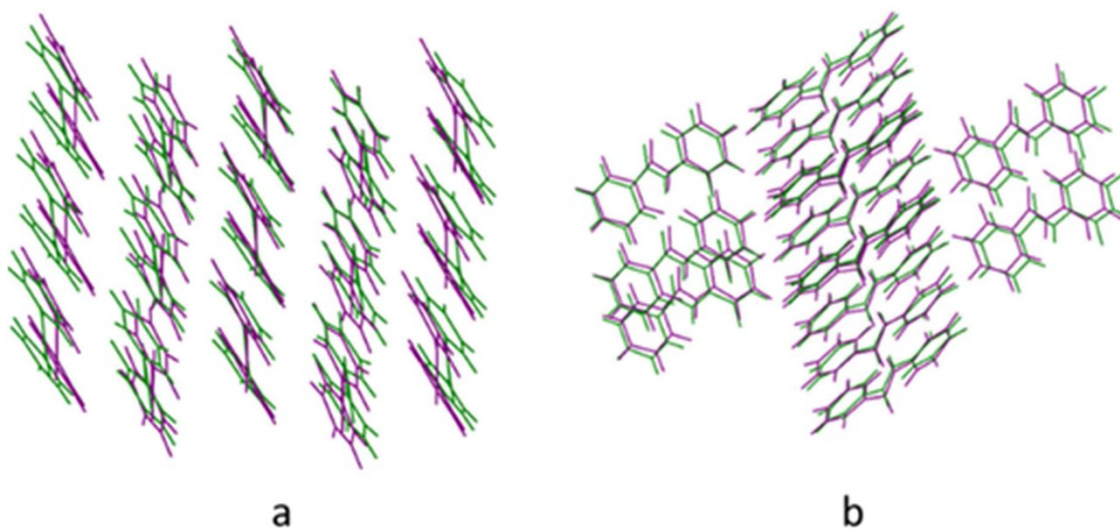

**F-2(t):** The overlay diagram of the 15 molecules of the experimental (green) and predicted (purple) structure of a) **P2040 (Form 1)** and the 2<sup>nd</sup> rank structure with an RMS deviation of 0.488 Å. b) **P2400** and the 24<sup>th</sup> rank structure with an RMS deviation of 0.415 Å.

**T-3: The lattice energy (in kJ/mol) of all the experimental crystal structures**

| Compound code | Total energy | Compound code  | Total energy |
|---------------|--------------|----------------|--------------|
| P0024         | -108.0       | P3435          | -111.8       |
| P0026         | -106.1       | P3500          | -121.5       |
| P0034         | -126.9       | P0000          | -121.7       |
| P0035         | -117.3       | P2040 (Form 1) | -110.1       |
| P2323         | -118.6       | P4000          | -124.1       |
| P2324         | -106.3       | P3000          | -123.4       |
| P2334         | -111.7       | P0040          | -123.3       |
| P2335         | -106.2       | P0020          | -109.5       |
| P2400         | -112.0       | P3020          | -108.6       |
| P2423         | -99.4        | P4040          | -120.3       |
| P2500         | -115.8       | QUKVUN         | -108.3       |
| P3400         | -123.4       | P2040 (Form 2) | -113.4       |
| P3423         | -113.0       |                |              |

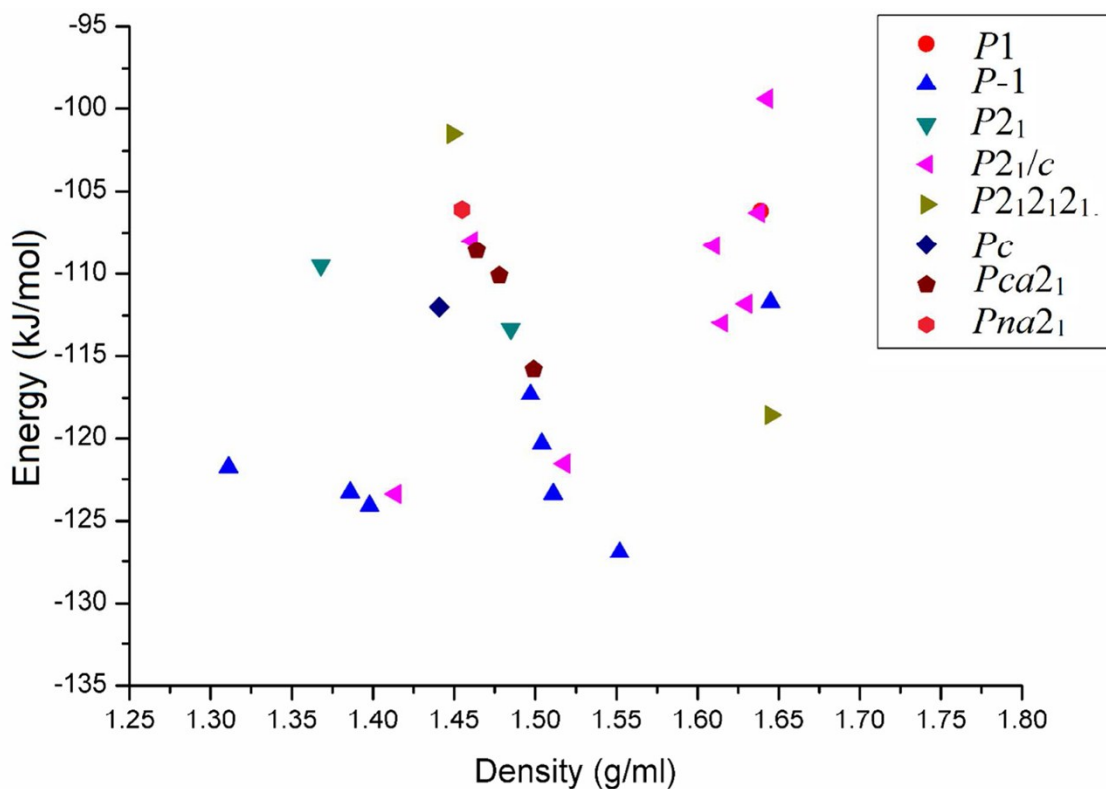

F-3: Plot of relative lattice energies versus densities of experimental crystal structures in different space groups.

T-4: Experimental structures of fluorinated benzanilides in decafluoro-substituted benzanilide (all the hydrogen atoms are replaced by fluorine atoms) landscape.

| Group   | Compound Code                                          | Unit Cell Type | Rank                                                                                                            | Space Groups                                        |
|---------|--------------------------------------------------------|----------------|-----------------------------------------------------------------------------------------------------------------|-----------------------------------------------------|
| Group 1 | P0000, P0034, P0035, P2334, P3400, P4000, P0040, P4040 | 5-8-12         | 3 <sup>rd</sup> , 4 <sup>th</sup> , 6 <sup>th</sup>                                                             | <i>P</i> -1                                         |
| Group 2 | P3500                                                  | 10-5-20        | 10 <sup>th</sup>                                                                                                | <i>P</i> <sub>2</sub> / <i>c</i>                    |
| Group 3 | P0024, P3423, P3435, QUKVUN, P2324, P2423, P3000       | 5-8-25         | 87 <sup>th</sup>                                                                                                | <i>P</i> <sub>2</sub> / <i>c</i>                    |
| Group 4 | P2323                                                  | 5-9-23         | 8 <sup>th</sup> , 63 <sup>rd</sup> , 68 <sup>th</sup> , 81 <sup>st</sup> , 94 <sup>th</sup> , 100 <sup>th</sup> | <i>P</i> <sub>2</sub> 1 <sub>2</sub> 1 <sub>1</sub> |
| Group 5 | P2040 (Form 2), P002C                                  | 5-5-19         | 51 <sup>st</sup>                                                                                                | <i>P</i> <sub>2</sub> 1                             |
| Group 6 | P2335                                                  | 5-5-12         | 69 <sup>th</sup>                                                                                                | <i>P</i> 1                                          |
| Group 7 | P0026                                                  | 10-21-5        | 1 <sup>st</sup> , 14 <sup>th</sup> , 39 <sup>th</sup> , 44 <sup>th</sup>                                        | <i>P</i> na2 <sub>1</sub>                           |
| Group 8 | P2500, P2040 (Form 1), P302C                           | 24-5-8         | 82 <sup>nd</sup>                                                                                                | <i>P</i> ca2 <sub>1</sub>                           |
| Group 9 | P2400                                                  | 5-5-19         | 58 <sup>th</sup>                                                                                                | <i>P</i> c                                          |

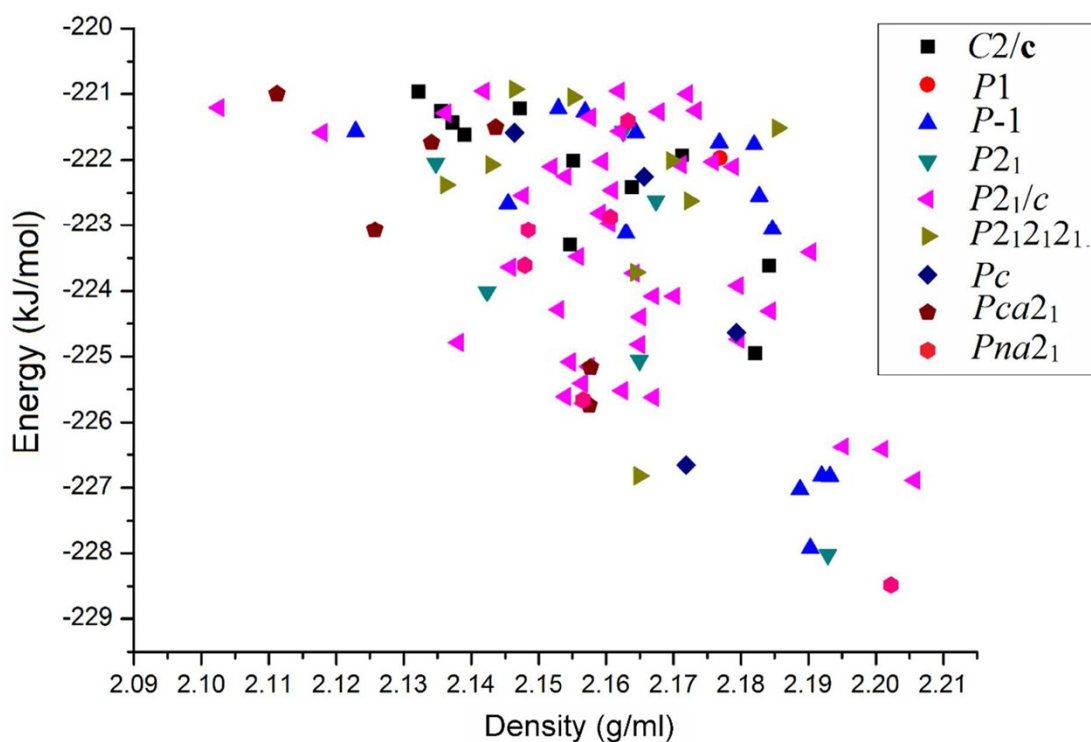

F-4: Plot of relative lattice energies versus densities of the top 100 predicted structure of decafluoro-substituted benzanilide (all the hydrogen atoms are replaced by fluorine atoms) in different space groups.

T-5: Top 100 polymorph predictions for decafluoro-substituted benzanilide (all the hydrogen atoms are replaced by fluorine atoms).

| Rank | Space group                                     | Cell volume (Å <sup>3</sup> ) | Density (g/ml) | Total energy (kJ/mol) | Length a (Å) | Length b (Å) | Length c (Å) | Angle alpha (°) | Angle beta (°) | Angle gamma (°) |
|------|-------------------------------------------------|-------------------------------|----------------|-----------------------|--------------|--------------|--------------|-----------------|----------------|-----------------|
| 1    | <i>Pna2<sub>1</sub></i>                         | 1137.482                      | 2.202          | -228.48               | 21.8453      | 10.4265      | 4.9940       | 90              | 90             | 90              |
| 2    | <i>P2<sub>1</sub></i>                           | 571.168                       | 2.193          | -228.02               | 11.0476      | 5.0252       | 10.4528      | 90              | 100.178        | 90              |
| 3    | <i>P-1</i>                                      | 571.846                       | 2.190          | -227.92               | 9.9619       | 12.0843      | 4.9040       | 77.015          | 94.921         | 87              |
| 4    | <i>P-1</i>                                      | 572.245                       | 2.189          | -227.03               | 4.9026       | 12.0855      | 9.7482       | 88.584          | 92.444         | 82.806          |
| 5    | <i>P2<sub>1</sub>/c</i>                         | 1135.685                      | 2.206          | -226.89               | 16.3784      | 15.3649      | 18.7612      | 90              | 166.081        | 90              |
| 6    | <i>P-1</i>                                      | 571.089                       | 2.193          | -226.83               | 9.7489       | 4.8927       | 12.1173      | 82.139          | 93.482         | 92.601          |
| 7    | <i>P-1</i>                                      | 571.406                       | 2.192          | -226.82               | 9.7540       | 4.8981       | 15.9794      | 100.31          | 128.977        | 92.568          |
| 8    | <i>P2<sub>1</sub>2<sub>1</sub>2<sub>1</sub></i> | 1157.095                      | 2.165          | -226.82               | 22.1517      | 10.7008      | 4.8814       | 90              | 90             | 90              |
| 9    | <i>Pc</i>                                       | 576.691                       | 2.172          | -226.66               | 11.3683      | 5.0274       | 10.4074      | 90              | 104.18         | 90              |
| 10   | <i>P2<sub>1</sub>/c</i>                         | 1138.135                      | 2.201          | -226.41               | 11.4286      | 5.0133       | 20.4508      | 90              | 76.249         | 90              |
| 11   | <i>P2<sub>1</sub>/c</i>                         | 1141.159                      | 2.195          | -226.37               | 20.6450      | 11.6366      | 20.1338      | 90              | 166.354        | 90              |
| 12   | <i>Pca2<sub>1</sub></i>                         | 1161.059                      | 2.158          | -225.74               | 9.8225       | 5.1700       | 22.8634      | 90              | 90             | 90              |
| 13   | <i>P2<sub>1</sub>/c</i>                         | 1161.486                      | 2.157          | -225.71               | 30.7698      | 5.1754       | 9.8149       | 90              | 132.002        | 90              |

|    |              |          |       |         |         |         |         |        |         |         |
|----|--------------|----------|-------|---------|---------|---------|---------|--------|---------|---------|
| 14 | $Pna2_1$     | 1161.541 | 2.157 | -225.66 | 10.7277 | 22.3948 | 4.8349  | 90     | 90      | 90      |
| 15 | $P2_1/c$     | 1155.963 | 2.167 | -225.62 | 33.9408 | 5.0390  | 10.2388 | 90     | 41.31   | 90      |
| 16 | $P2_1/c$     | 1162.953 | 2.154 | -225.61 | 28.2205 | 5.1520  | 9.8167  | 90     | 125.432 | 90      |
| 17 | $P2_1/c$     | 1158.429 | 2.162 | -225.52 | 27.4028 | 4.9918  | 25.6325 | 90     | 160.707 | 90      |
| 18 | $P2_1/c$     | 1161.629 | 2.156 | -225.41 | 21.0203 | 4.9952  | 11.1298 | 90     | 83.722  | 90      |
| 19 | $Pca2_1$     | 1160.957 | 2.158 | -225.16 | 9.8007  | 5.2315  | 22.6429 | 90     | 90      | 90      |
| 20 | $P2_1/c$     | 1161.059 | 2.158 | -225.15 | 25.3836 | 5.2313  | 9.8023  | 90     | 116.876 | 90      |
| 21 | $P2_1/c$     | 1162.593 | 2.155 | -225.08 | 33.8015 | 5.2443  | 9.8548  | 90     | 138.278 | 90      |
| 22 | $P2_1$       | 578.533  | 2.165 | -225.06 | 10.2381 | 5.0075  | 11.5262 | 90     | 101.752 | 90      |
| 23 | $C2/c$       | 2295.940 | 2.182 | -224.95 | 32.6298 | 4.9293  | 48.8381 | 90     | 163.005 | 90      |
| 24 | $P2_1/c$     | 1157.064 | 2.165 | -224.82 | 32.1570 | 5.0164  | 10.3800 | 90     | 136.289 | 90      |
| 25 | $P2_1/c$     | 1171.621 | 2.138 | -224.79 | 5.2892  | 22.9339 | 9.7743  | 90     | 81.184  | 90      |
| 26 | $P2_1/c$     | 1149.269 | 2.180 | -224.74 | 18.5046 | 4.8424  | 23.4549 | 90     | 146.851 | 90      |
| 27 | $Pc$         | 574.715  | 2.179 | -224.64 | 10.8565 | 5.0335  | 10.6009 | 90     | 97.213  | 90      |
| 28 | $P2_1/c$     | 1156.985 | 2.165 | -224.4  | 22.2543 | 4.8304  | 18.7362 | 90     | 144.939 | 90      |
| 29 | $P2_1/c$     | 1146.799 | 2.184 | -224.31 | 4.9027  | 24.6070 | 9.5835  | 90     | 82.702  | 90      |
| 30 | $P2_1/c$     | 1163.520 | 2.153 | -224.29 | 12.4815 | 19.8456 | 12.1082 | 90     | 157.173 | 90      |
| 31 | $P2_1/c$     | 1155.957 | 2.167 | -224.08 | 20.8746 | 4.8409  | 18.6414 | 90     | 142.146 | 90      |
| 32 | $P2_1/c$     | 1154.324 | 2.170 | -224.08 | 13.7356 | 20.8928 | 11.8056 | 90     | 160.079 | 90      |
| 33 | $P2_1$       | 584.640  | 2.142 | -224.01 | 9.1333  | 4.9246  | 13.0119 | 90     | 87.388  | 90      |
| 34 | $P2_1/c$     | 1149.318 | 2.180 | -223.92 | 16.3998 | 4.8217  | 22.0662 | 90     | 138.8   | 90      |
| 35 | $P2_1/c$     | 1157.495 | 2.164 | -223.73 | 10.2595 | 24.6178 | 9.8980  | 90     | 152.418 | 90      |
| 36 | $P2_12_12_1$ | 1157.347 | 2.164 | -223.72 | 11.3463 | 5.0076  | 20.3692 | 90     | 90      | 90      |
| 37 | $P2_1/c$     | 1167.413 | 2.146 | -223.64 | 39.7538 | 5.0412  | 10.2122 | 90     | 34.779  | 90      |
| 38 | $C2/c$       | 2293.814 | 2.184 | -223.62 | 30.7067 | 4.9020  | 23.9053 | 90     | 39.603  | 90      |
| 39 | $Pna2_1$     | 1166.245 | 2.148 | -223.61 | 22.2073 | 4.8659  | 10.7926 | 90     | 90      | 90      |
| 40 | $P2_1/c$     | 1161.931 | 2.156 | -223.48 | 18.8219 | 4.8261  | 24.5276 | 90     | 148.566 | 90      |
| 41 | $P2_1/c$     | 1143.670 | 2.190 | -223.41 | 32.6384 | 4.9571  | 10.0485 | 90     | 135.294 | 90      |
| 42 | $C2/c$       | 2325.182 | 2.155 | -223.3  | 46.0636 | 5.0440  | 47.5293 | 90     | 167.845 | 90      |
| 43 | $P-1$        | 579.065  | 2.163 | -223.12 | 11.2084 | 12.5200 | 9.7887  | 76.023 | 26.461  | 83.108  |
| 44 | $Pna2_1$     | 1165.964 | 2.148 | -223.07 | 20.5092 | 11.3355 | 5.0153  | 90     | 90      | 90      |
| 45 | $Pca2_1$     | 1178.432 | 2.126 | -223.07 | 5.0234  | 21.6830 | 10.8190 | 90     | 90      | 90      |
| 46 | $P-1$        | 573.315  | 2.185 | -223.06 | 18.2477 | 4.9604  | 10.6174 | 89.113 | 138.297 | 73.577  |
| 47 | $P2_1/c$     | 1159.433 | 2.161 | -222.97 | 12.5120 | 19.9024 | 12.0547 | 90     | 157.279 | 90      |
| 48 | $Pna2_1$     | 1159.369 | 2.161 | -222.87 | 24.2807 | 9.7041  | 4.9205  | 90     | 90      | 90      |
| 49 | $P2_1/c$     | 1160.203 | 2.159 | -222.81 | 38.9091 | 5.0292  | 11.3626 | 90     | 31.453  | 90      |
| 50 | $P-1$        | 583.803  | 2.145 | -222.66 | 13.4987 | 10.5898 | 4.9507  | 60.858 | 73.278  | 73.823  |
| 51 | $P2_1$       | 577.882  | 2.167 | -222.62 | 4.9958  | 5.3145  | 21.7691 | 90     | 88.983  | 90      |
| 52 | $P2_12_12_1$ | 1153.125 | 2.172 | -222.62 | 5.3309  | 43.1281 | 5.0155  | 90     | 90      | 90      |
| 53 | $P-1$        | 573.825  | 2.183 | -222.55 | 14.7921 | 10.6368 | 4.9592  | 90.671 | 111.398 | 124.518 |
| 54 | $P2_1/c$     | 1166.399 | 2.148 | -222.54 | 25.7764 | 4.9373  | 30.9847 | 90     | 162.795 | 90      |
| 55 | $P2_1/c$     | 1159.194 | 2.161 | -222.46 | 11.5708 | 21.0533 | 11.3223 | 90     | 155.148 | 90      |



|    |              |          |       |         |         |         |         |        |         |         |
|----|--------------|----------|-------|---------|---------|---------|---------|--------|---------|---------|
| 56 | $C2/c$       | 2315.365 | 2.164 | -222.41 | 58.5899 | 4.9940  | 10.0271 | 90     | 52.107  | 90      |
| 57 | $P2_12_12_1$ | 1172.644 | 2.136 | -222.38 | 13.6110 | 17.4119 | 4.9480  | 90     | 90      | 90      |
| 58 | $Pc$         | 578.352  | 2.166 | -222.25 | 4.9952  | 5.2834  | 24.1994 | 90     | 115.1   | 90      |
| 59 | $P2_1/c$     | 1162.930 | 2.154 | -222.25 | 26.7447 | 9.0363  | 28.7265 | 90     | 170.357 | 90      |
| 60 | $P2_1/c$     | 1149.694 | 2.179 | -222.1  | 36.9572 | 4.9141  | 10.2688 | 90     | 141.940 | 90      |
| 61 | $P2_1/c$     | 1164.066 | 2.152 | -222.1  | 16.6481 | 16.3415 | 15.0501 | 90     | 163.483 | 90      |
| 62 | $P2_1/c$     | 1153.787 | 2.171 | -222.07 | 4.9955  | 5.2912  | 43.6550 | 90     | 90.823  | 90      |
| 63 | $P2_12_12_1$ | 1168.970 | 2.143 | -222.07 | 10.5214 | 21.9574 | 5.0600  | 90     | 90      | 90      |
| 64 | $P2_1$       | 586.721  | 2.135 | -222.05 | 11.3909 | 4.9404  | 11.1585 | 90     | 69.121  | 90      |
| 65 | $P2_1/c$     | 1151.246 | 2.176 | -222.03 | 43.4283 | 5.0164  | 43.4296 | 90     | 173.011 | 90      |
| 66 | $P2_1/c$     | 1160.023 | 2.159 | -222.02 | 9.1652  | 25.2762 | 10.2930 | 90     | 150.89  | 90      |
| 67 | $C2/c$       | 2324.641 | 2.155 | -222.01 | 57.1753 | 5.0048  | 10.0820 | 90     | 53.685  | 90      |
| 68 | $P2_12_12_1$ | 1154.536 | 2.170 | -222.01 | 22.6641 | 4.9678  | 10.2542 | 90     | 90      | 90      |
| 69 | $P1$         | 287.681  | 2.177 | -221.97 | 5.1812  | 12.4866 | 7.3281  | 64.662 | 42.948  | 77.97   |
| 70 | $C2/c$       | 2307.404 | 2.171 | -221.92 | 47.4543 | 4.9863  | 49.7611 | 90     | 168.699 | 90      |
| 71 | $P-1$        | 574.029  | 2.182 | -221.76 | 5.0116  | 7.2693  | 31.0155 | 49.72  | 55.712  | 42.496  |
| 72 | $Pca2_1$     | 1173.790 | 2.134 | -221.73 | 10.8764 | 5.0410  | 21.4087 | 90     | 90      | 90      |
| 73 | $P-1$        | 575.392  | 2.177 | -221.73 | 4.9946  | 5.1996  | 24.3697 | 89.564 | 114.543 | 88.515  |
| 74 | $C2/c$       | 2342.211 | 2.139 | -221.61 | 46.3309 | 5.0472  | 47.7880 | 90     | 167.901 | 90      |
| 75 | $Pc$         | 583.535  | 2.146 | -221.58 | 18.4614 | 12.9520 | 14.3794 | 90     | 170.229 | 90      |
| 76 | $P2_1/c$     | 1182.795 | 2.118 | -221.58 | 12.9189 | 18.5492 | 4.9453  | 90     | 86.454  | 90      |
| 77 | $P-1$        | 578.677  | 2.164 | -221.58 | 4.8328  | 10.7753 | 12.8631 | 97.077 | 89.971  | 119.237 |
| 78 | $P2_1$       | 579.178  | 2.163 | -221.56 | 9.8522  | 4.9038  | 12.3330 | 90     | 76.416  | 90      |
| 79 | $P2_1/c$     | 1158.611 | 2.162 | -221.56 | 4.8213  | 20.9418 | 12.1013 | 90     | 108.513 | 90      |
| 80 | $P-1$        | 590.005  | 2.123 | -221.56 | 11.1632 | 4.9015  | 12.8592 | 87.386 | 117.878 | 107.341 |
| 81 | $P2_12_12_1$ | 1146.256 | 2.185 | -221.51 | 22.9485 | 5.0355  | 9.9194  | 90     | 90      | 90      |
| 82 | $Pca2_1$     | 1168.585 | 2.144 | -221.5  | 25.1368 | 5.0546  | 9.1974  | 90     | 90      | 90      |
| 83 | $C2/c$       | 2344.144 | 2.137 | -221.43 | 47.2613 | 5.0542  | 49.9006 | 90     | 168.658 | 90      |
| 84 | $Pna2_1$     | 1157.962 | 2.163 | -221.41 | 5.0122  | 43.7873 | 5.2762  | 90     | 90      | 90      |
| 85 | $P2_1/c$     | 1160.992 | 2.158 | -221.35 | 15.8928 | 10.1250 | 9.6428  | 90     | 131.563 | 90      |
| 86 | $P2_1/c$     | 1172.627 | 2.136 | -221.29 | 12.3641 | 4.9057  | 22.5217 | 90     | 120.861 | 90      |
| 87 | $P2_1/c$     | 1155.545 | 2.168 | -221.27 | 4.8015  | 10.6637 | 23.9115 | 90     | 70.704  | 90      |
| 88 | $P-1$        | 580.698  | 2.157 | -221.27 | 13.7469 | 15.0510 | 4.8539  | 107.53 | 109.511 | 125.986 |
| 89 | $C2/c$       | 2345.967 | 2.136 | -221.26 | 51.1762 | 5.0318  | 47.8853 | 90     | 169.033 | 90      |
| 90 | $P2_1/c$     | 1152.616 | 2.173 | -221.25 | 10.3967 | 22.3122 | 11.7080 | 90     | 154.888 | 90      |
| 91 | $P-1$        | 581.770  | 2.153 | -221.22 | 10.9997 | 13.8847 | 4.7839  | 111.29 | 102.676 | 111.03  |
| 92 | $C2/c$       | 2333.318 | 2.147 | -221.22 | 51.9047 | 4.9784  | 57.2266 | 90     | 170.921 | 90      |
| 93 | $P2_1/c$     | 1191.381 | 2.103 | -221.21 | 15.9461 | 19.0868 | 4.8895  | 90     | 126.816 | 90      |
| 94 | $P2_12_12_1$ | 1162.340 | 2.155 | -221.05 | 22.8664 | 10.5368 | 4.8242  | 90     | 90      | 90      |
| 95 | $P2_1/c$     | 1153.277 | 2.172 | -221.0  | 7.3008  | 44.2685 | 5.0162  | 90     | 134.654 | 90      |
| 96 | $Pca2_1$     | 1186.515 | 2.111 | -221.0  | 10.2785 | 5.0455  | 22.8793 | 90     | 90      | 90      |
| 97 | $C2/c$       | 2349.670 | 2.132 | -220.97 | 63.9818 | 5.04181 | 57.4259 | 90     | 172.713 | 90      |

|     |              |          |       |         |         |         |         |    |         |    |
|-----|--------------|----------|-------|---------|---------|---------|---------|----|---------|----|
| 98  | $P2_1/c$     | 1169.530 | 2.142 | -220.96 | 5.0128  | 11.9996 | 20.0274 | 90 | 103.875 | 90 |
| 99  | $P2_1/c$     | 1158.677 | 2.162 | -220.96 | 30.8433 | 5.0008  | 9.8618  | 90 | 130.383 | 90 |
| 100 | $P2_12_12_1$ | 1167.069 | 2.146 | -220.93 | 23.0425 | 10.1729 | 4.9788  | 90 | 90      | 90 |

F-5(a):  $^1\text{H-NMR}$  Spectra of P0024.

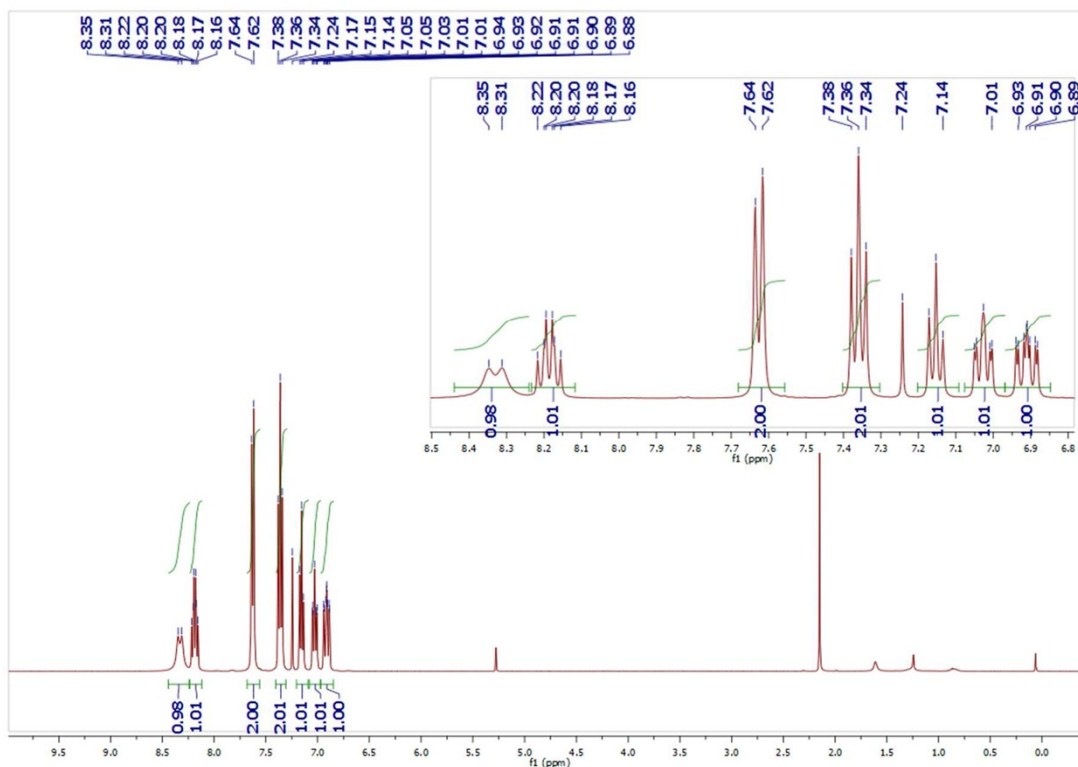



F-5(b): <sup>1</sup>H-NMR Spectra of P0026.

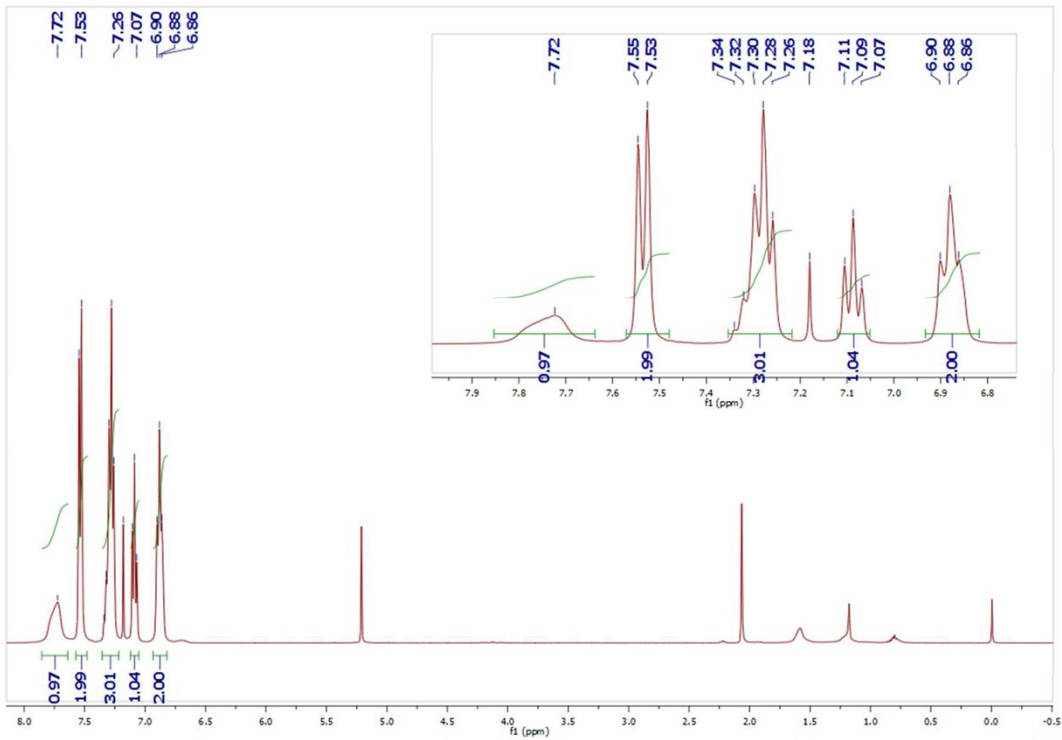

F-5(c): <sup>1</sup>H-NMR Spectra of P0034.

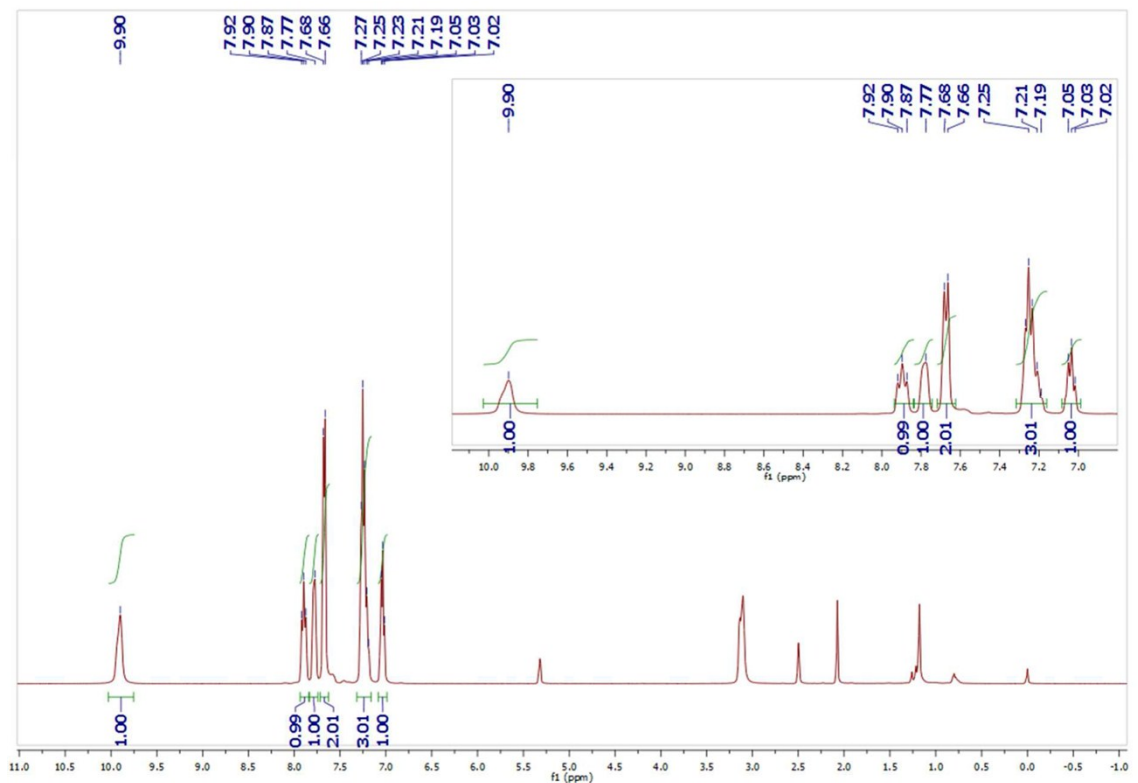

F-5(d): <sup>1</sup>H-NMR Spectra of P0035.

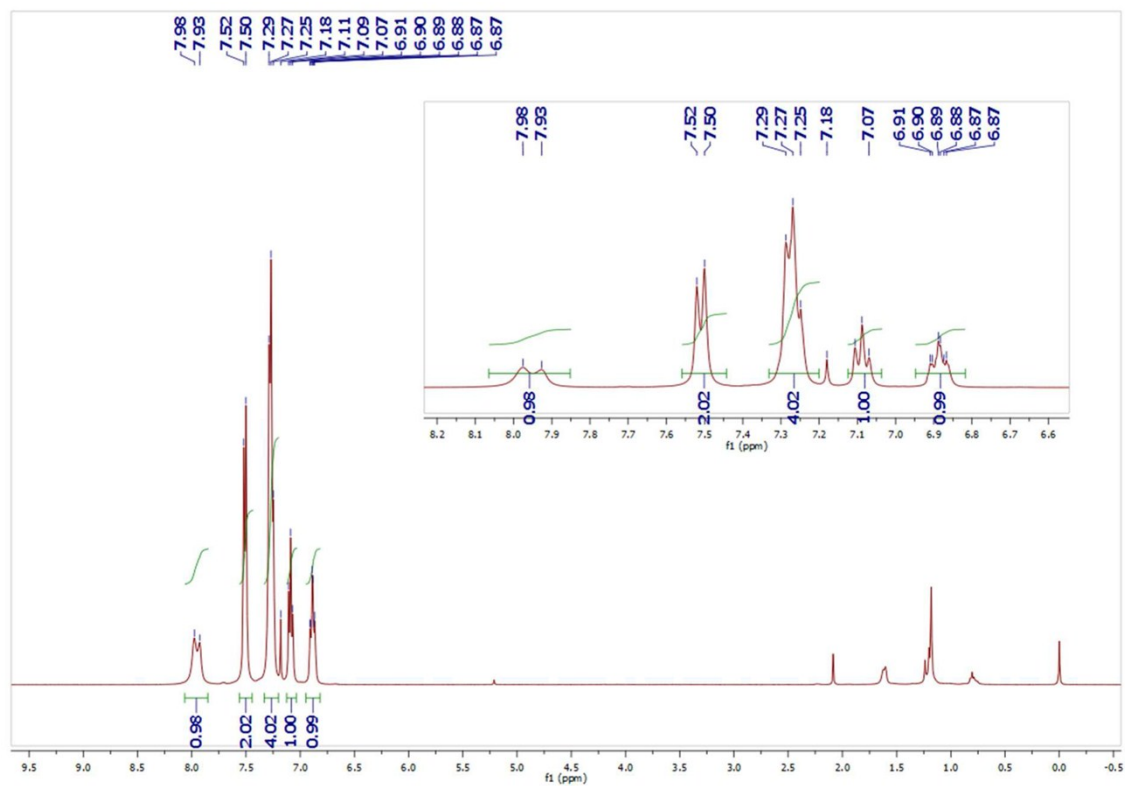

F-5(e): <sup>1</sup>H-NMR Spectra of P2323.

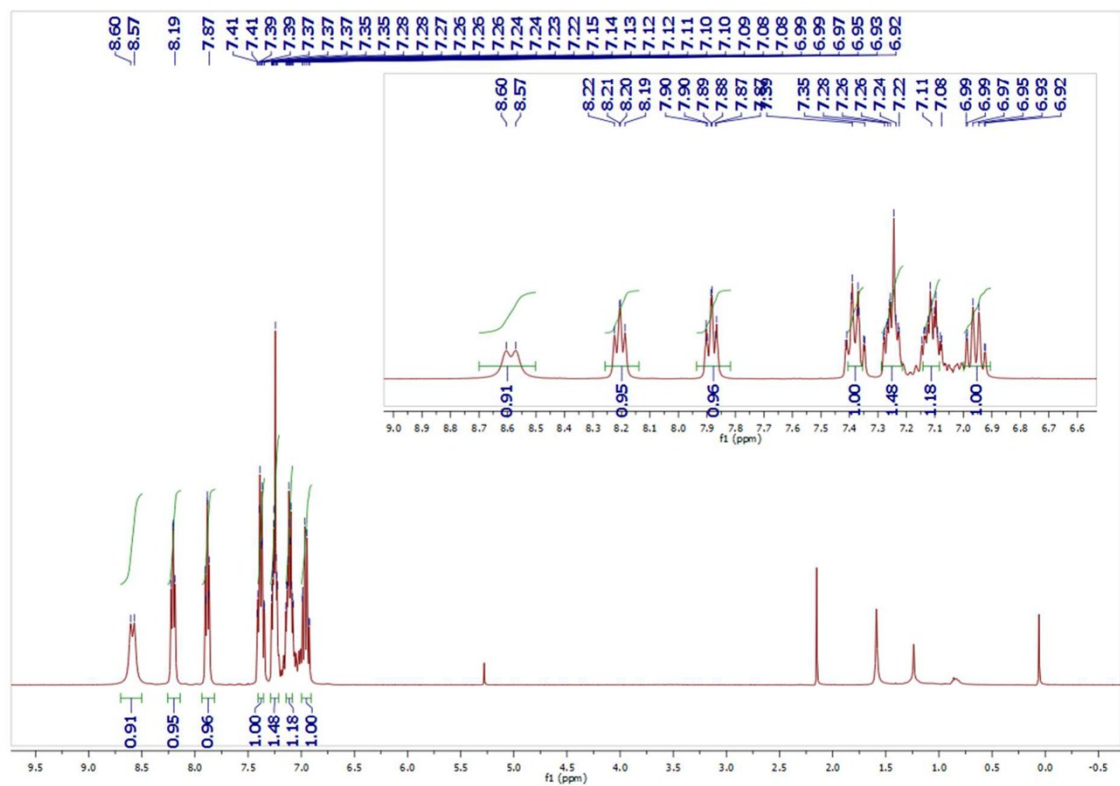

F-5(f): <sup>1</sup>H-NMR Spectra of P2324.

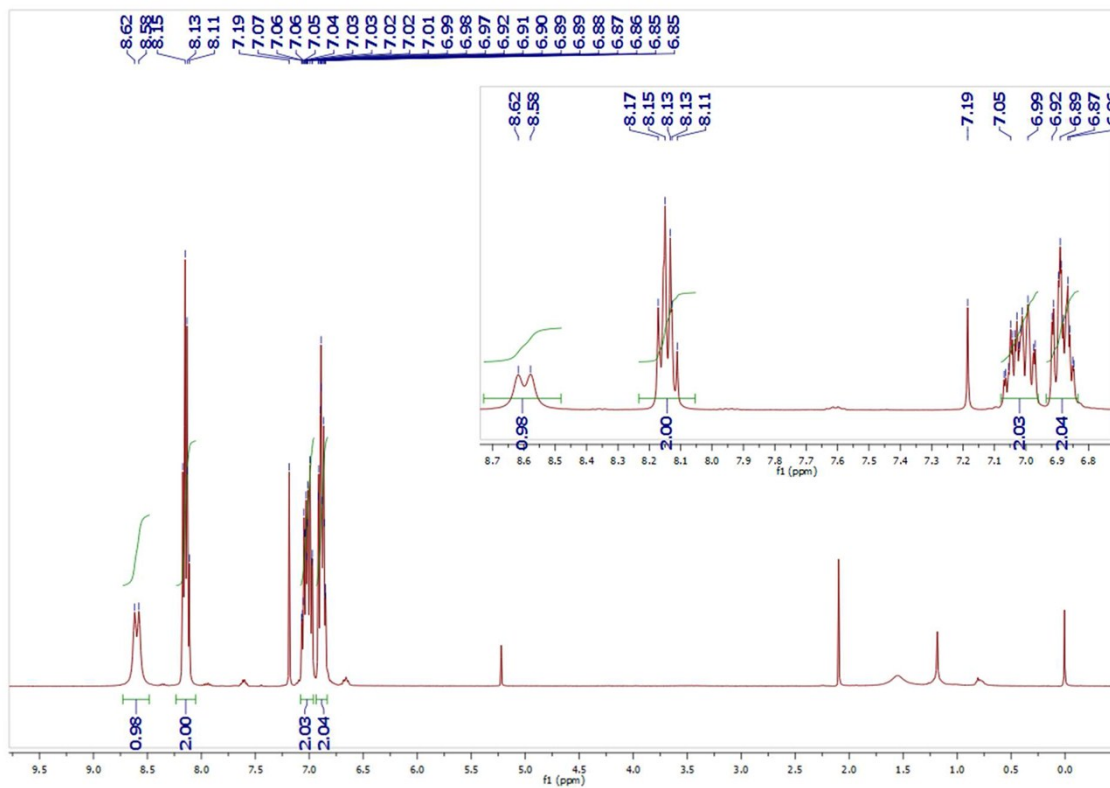

F-5(g): <sup>1</sup>H-NMR Spectra of P2334.

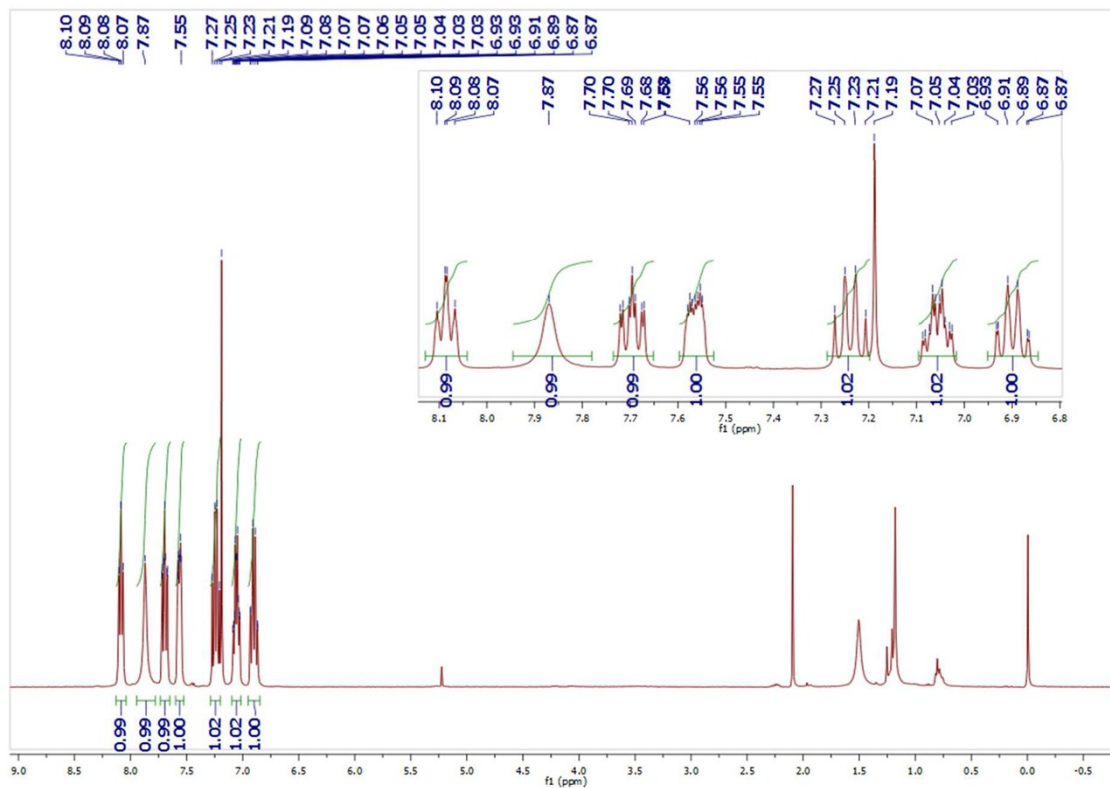

F-5(h):  $^1\text{H-NMR}$  Spectra of P2335.

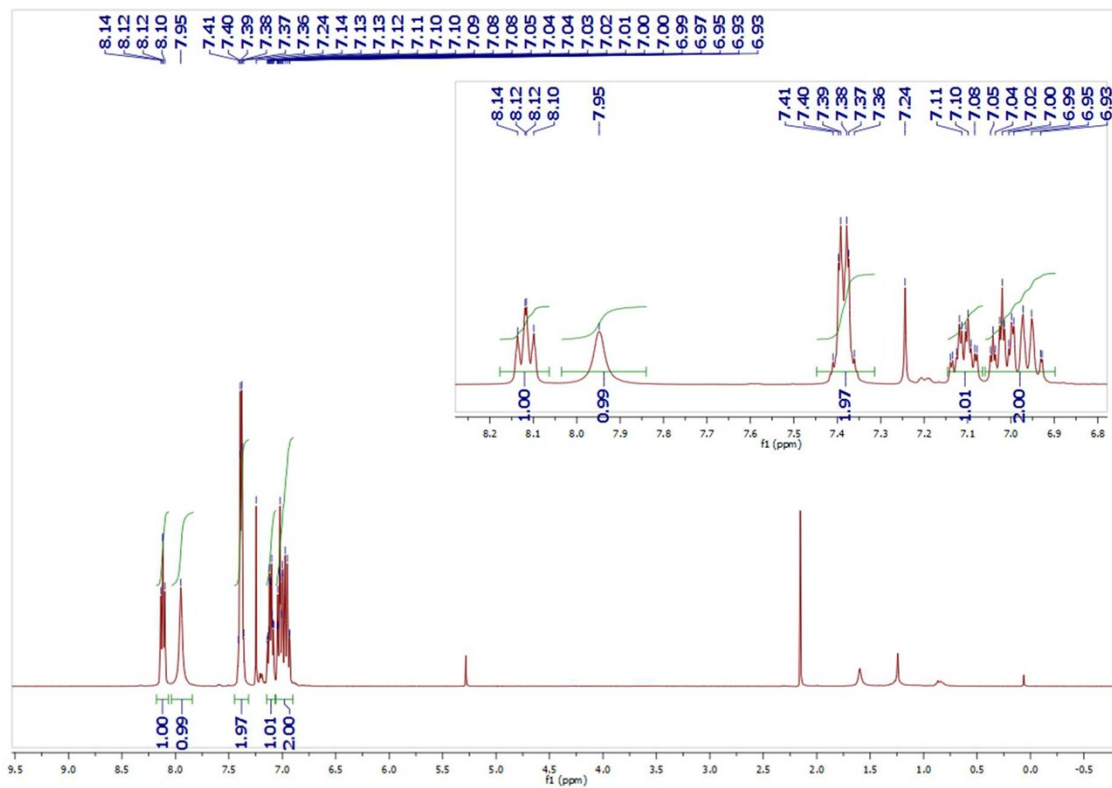

F-5(i):  $^1\text{H-NMR}$  Spectra of P2400.

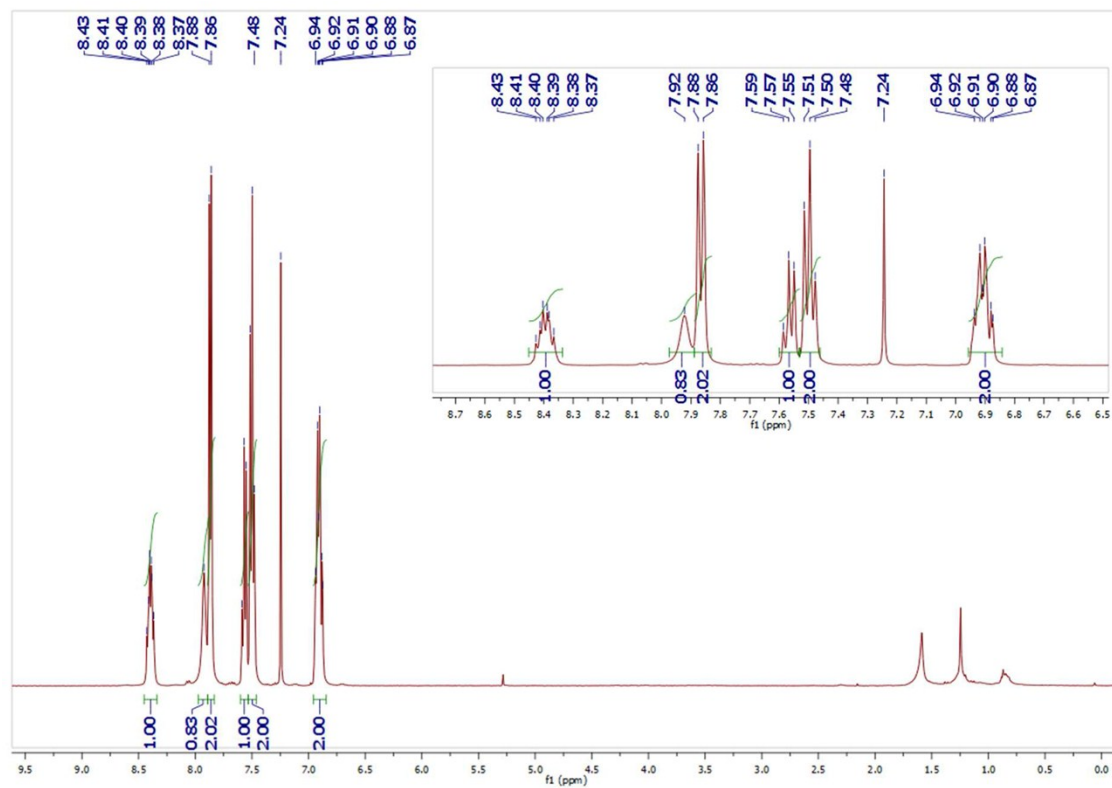

F-5(j): <sup>1</sup>H-NMR Spectra of P2423.

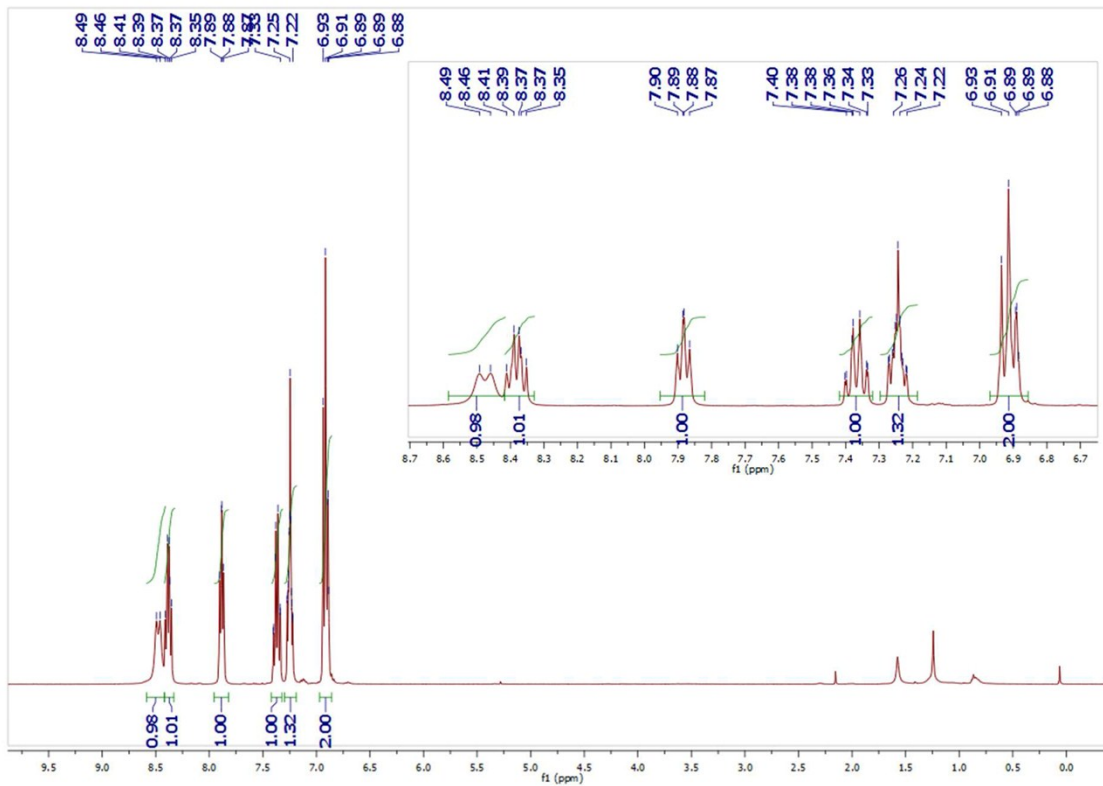

F-5(k): <sup>1</sup>H-NMR Spectra of P2500.

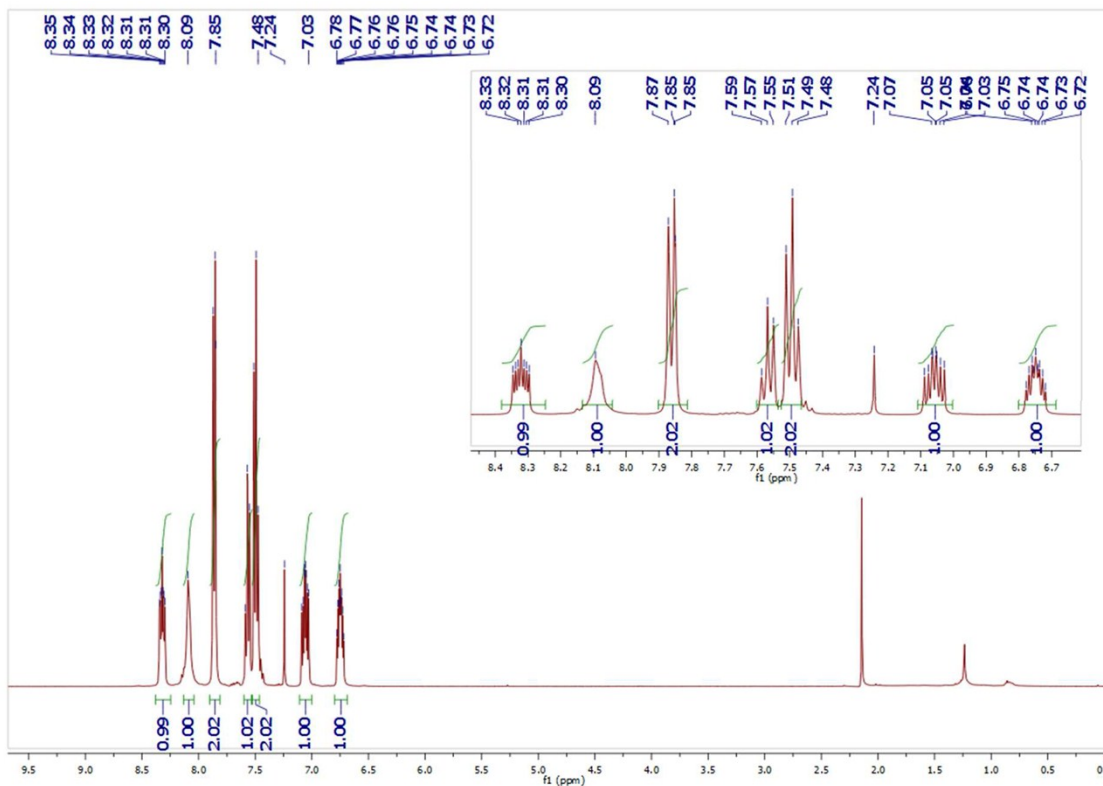

F-5(l): <sup>1</sup>H-NMR Spectra of P3400.

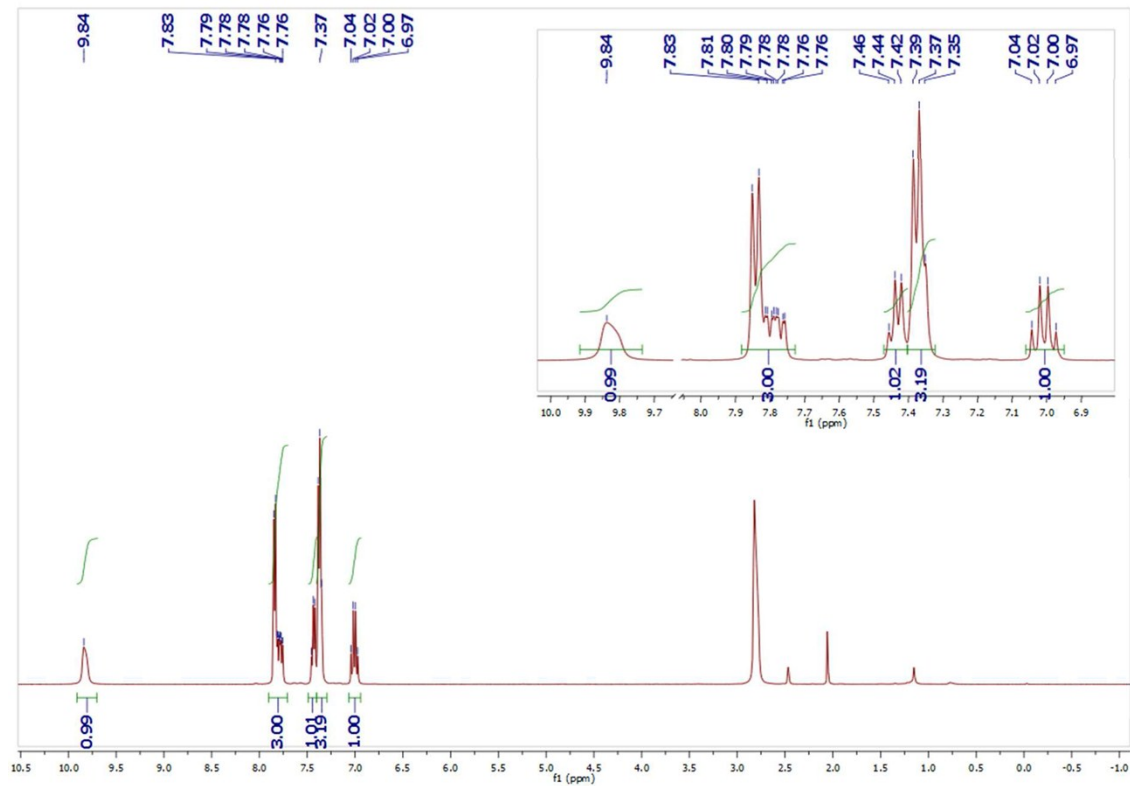

F-5(m): <sup>1</sup>H-NMR Spectra of P3423.

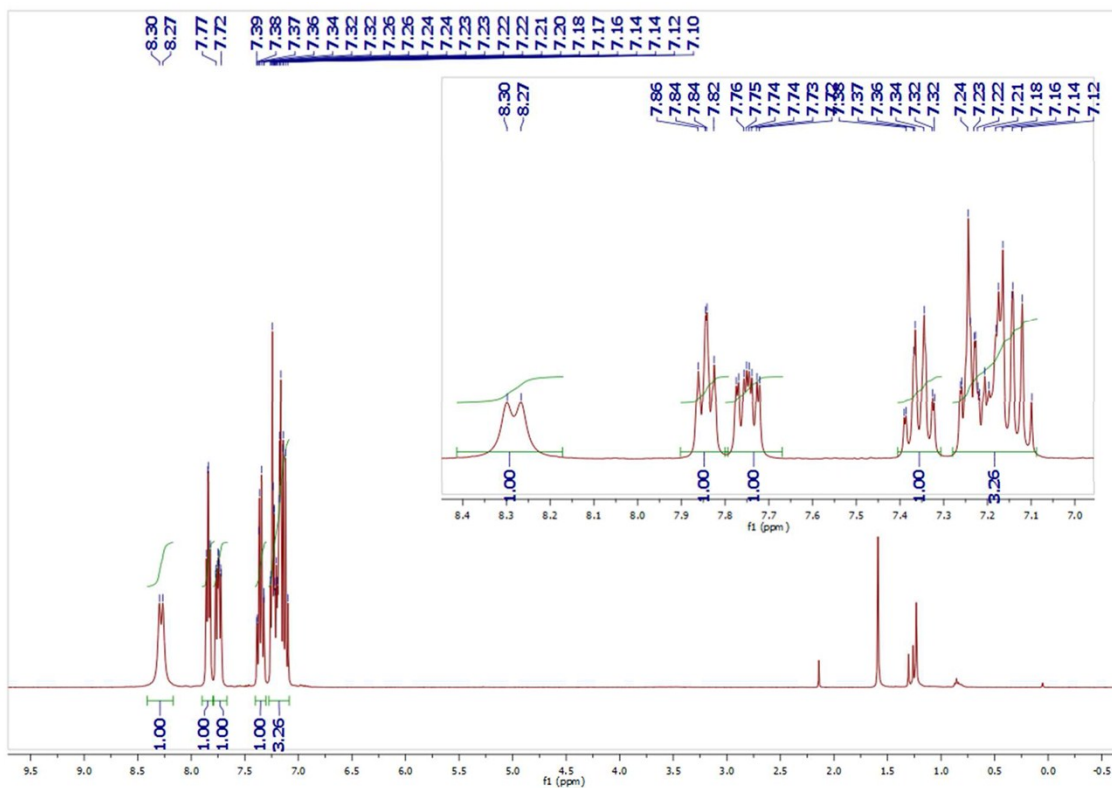



F-5(n): <sup>1</sup>H-NMR Spectra of P3435.

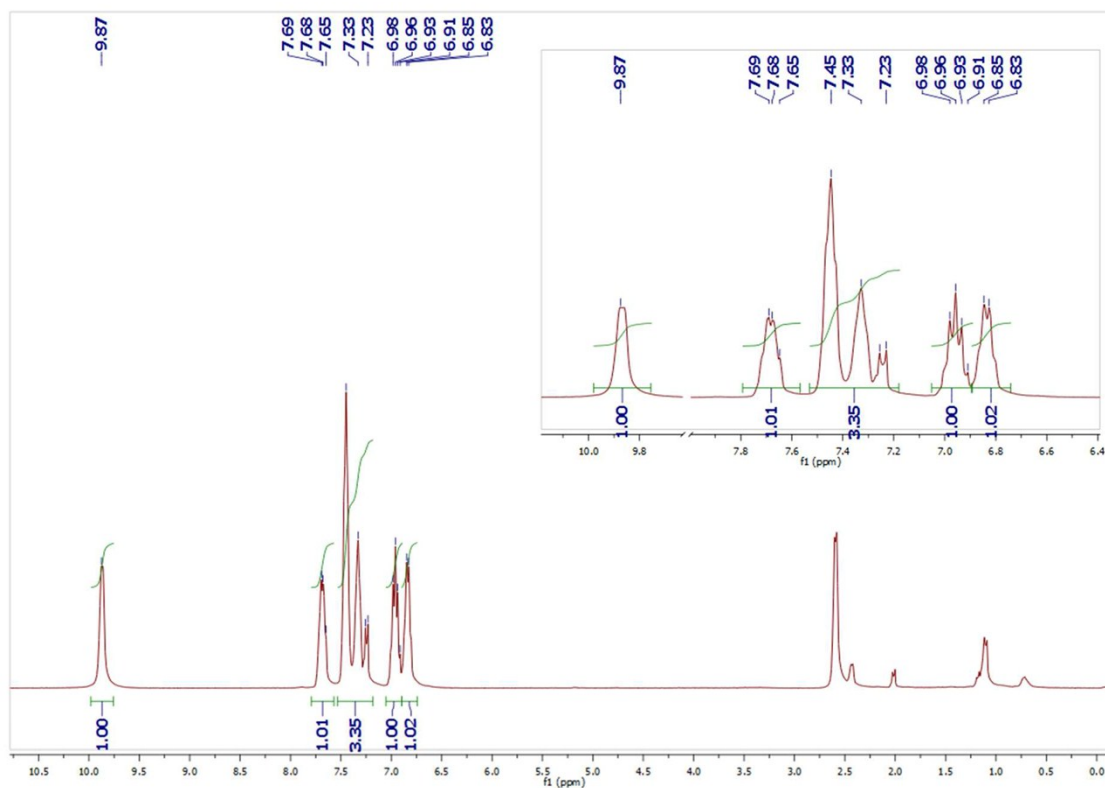

F-5(o): <sup>1</sup>H-NMR Spectra of P3500.

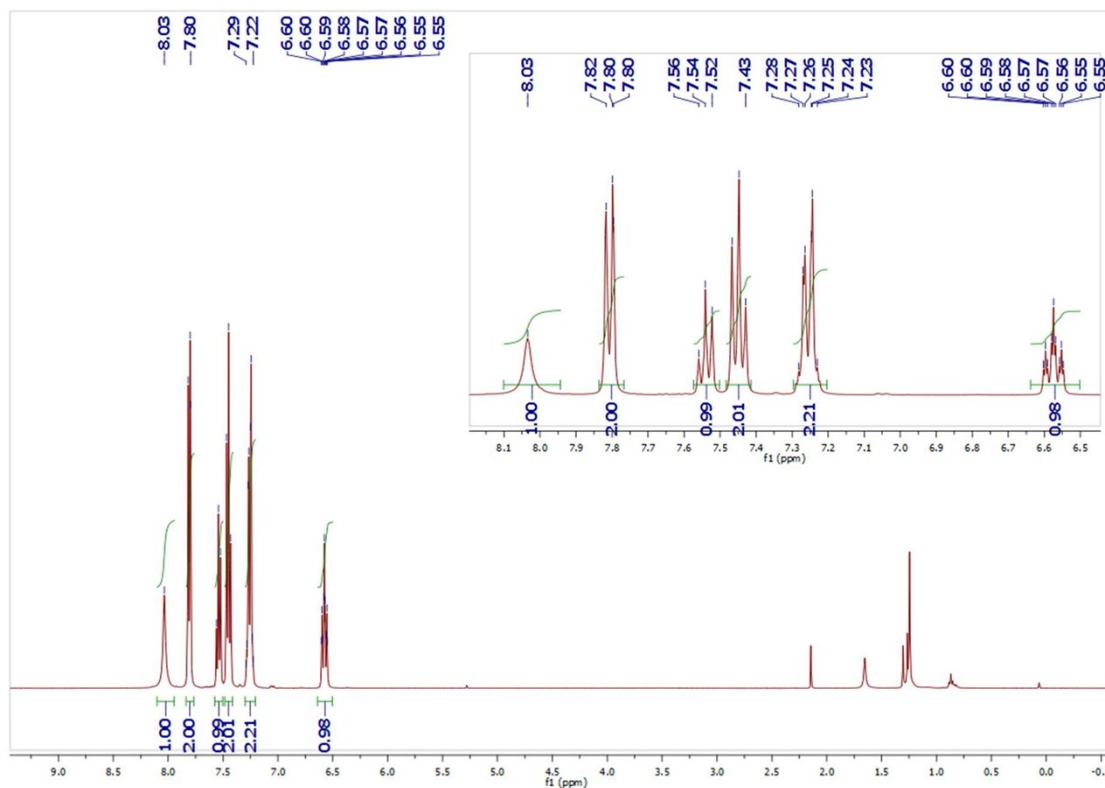

F-6(a): DSC traces of compound P0024 @5°C/min.

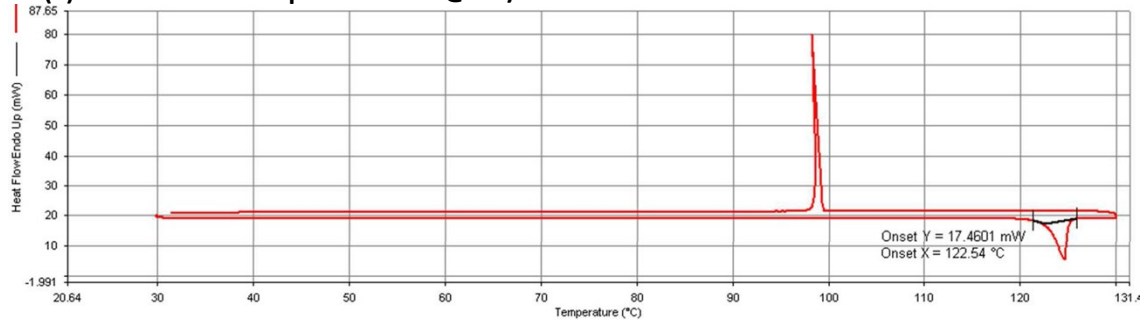

F-6(b): DSC traces of compound P0026 @5°C/min.

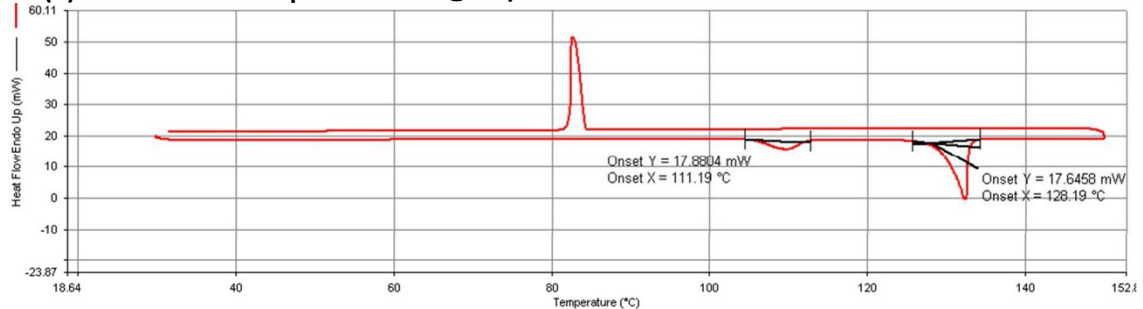

F-6(c): DSC traces of compound P0034 @5°C/min.

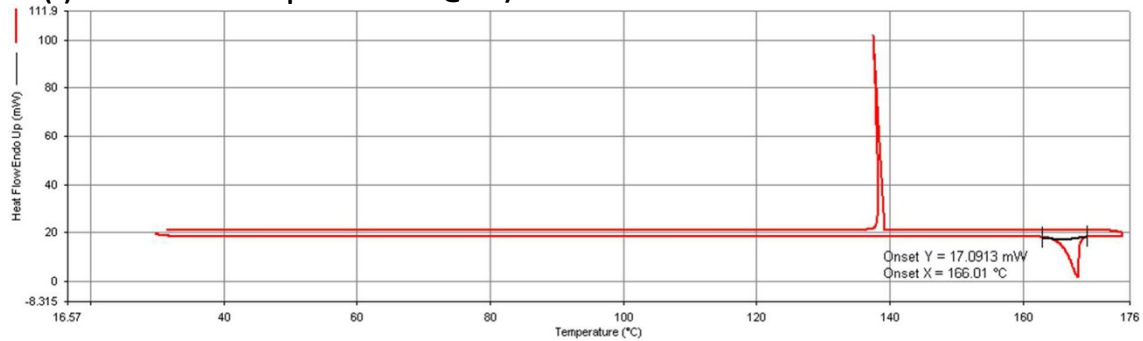

F-6(d): DSC traces of compound P0035 @5°C/min.

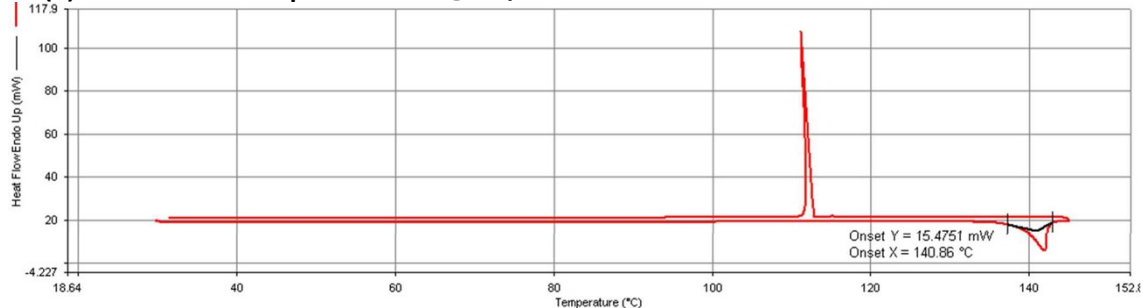



F-6(e): DSC traces of compound P2323 @5°C/min.

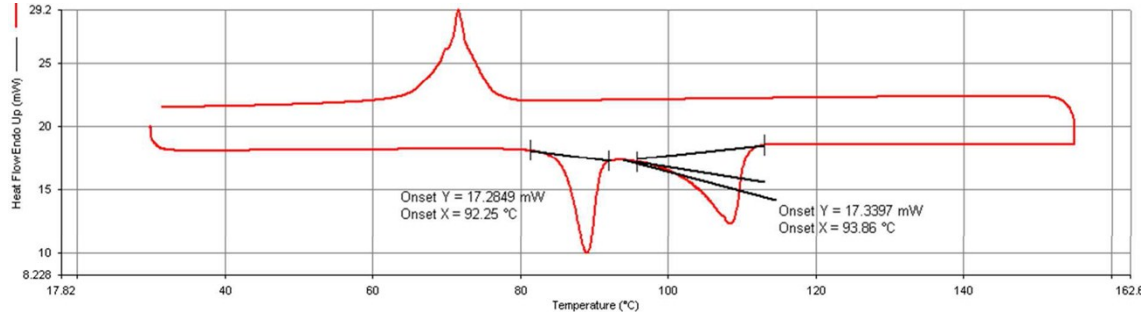

F-6(f): DSC traces of compound P2324 @5°C/min.

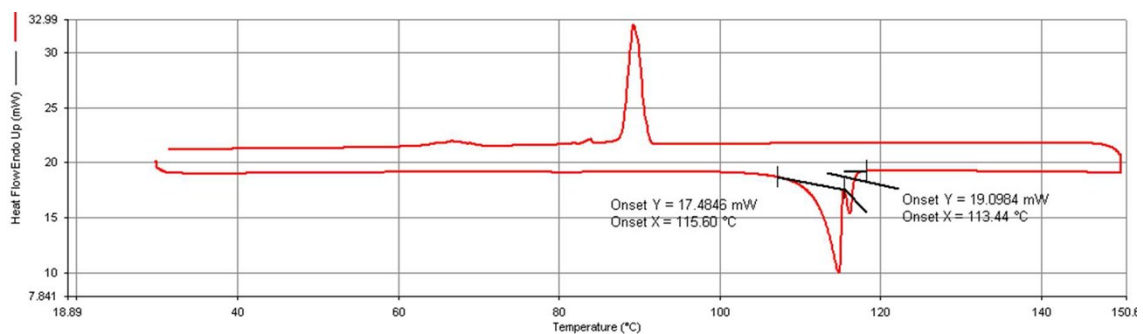

F-6(g): DSC traces of compound P2334 @5°C/min.

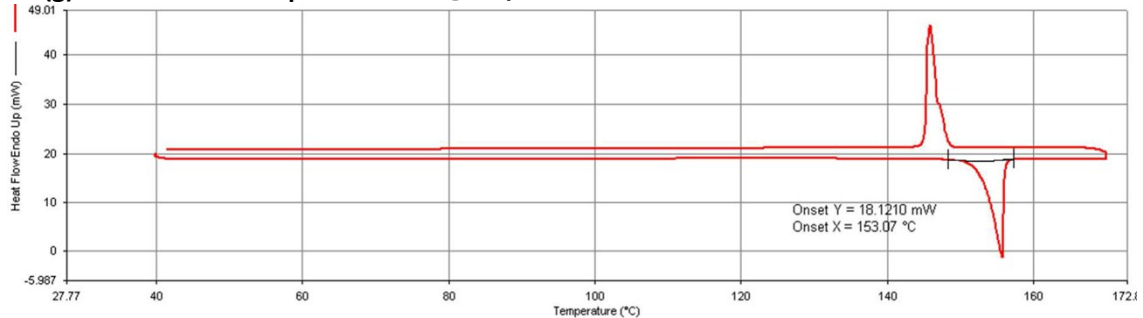

F-6(h): DSC traces of compound P2335 @5°C/min.

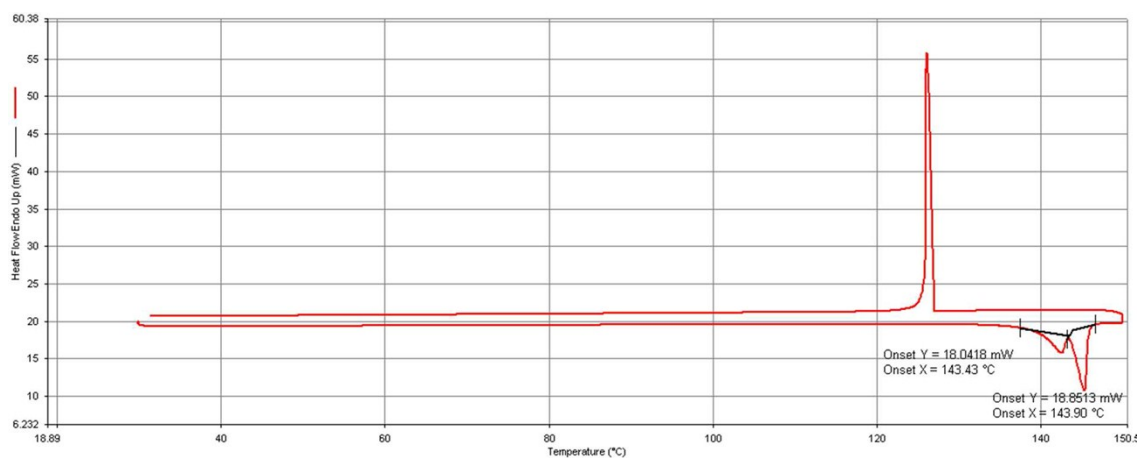

F-6(i): DSC traces of compound P2400 @5°C/min.

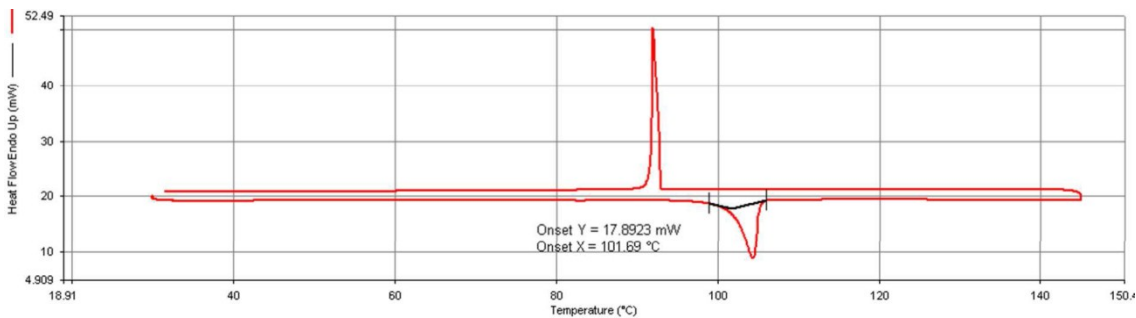

F-6(j): DSC traces of compound P2423 @5°C/min.

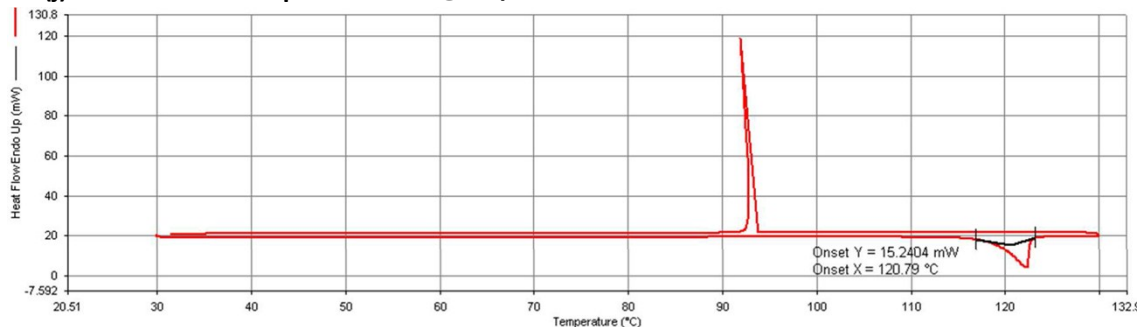

F-6(k): DSC traces of compound P2500 @5°C/min.

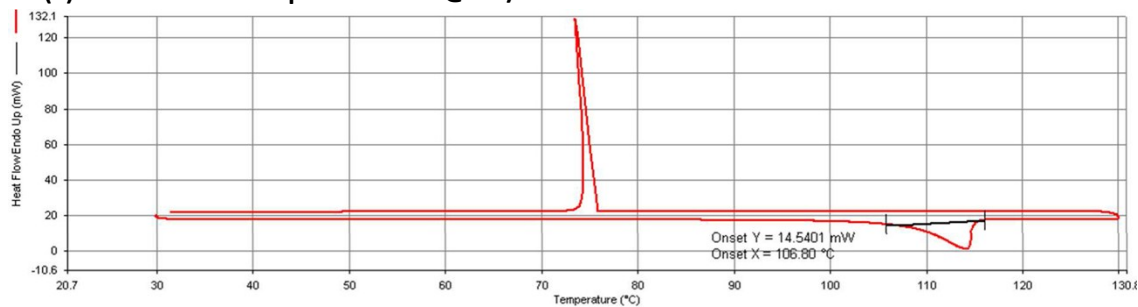

F-6(l): DSC traces of compound P3400 @5°C/min.

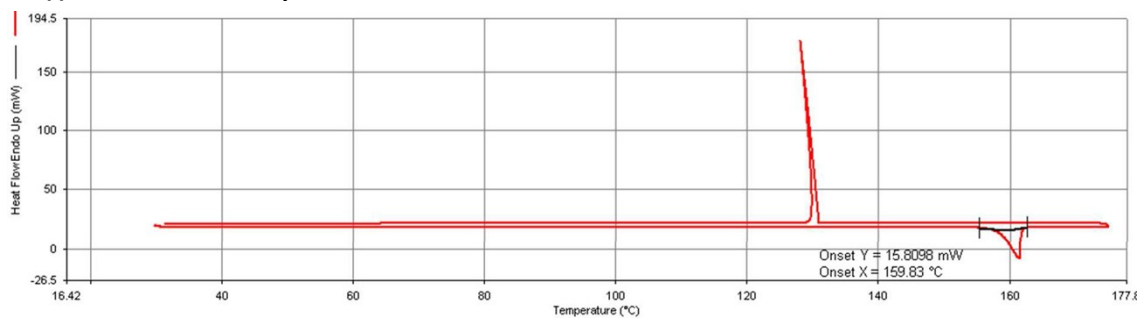

**F-6(n): DSC traces of compound P3435 @5°C/min.**

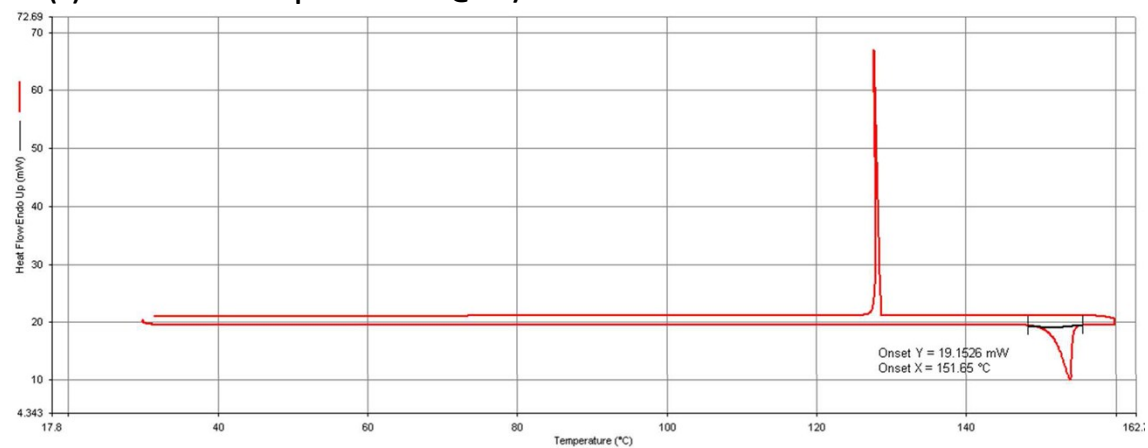

**F-6(o): DSC traces of compound P3500 @5°C/min.**

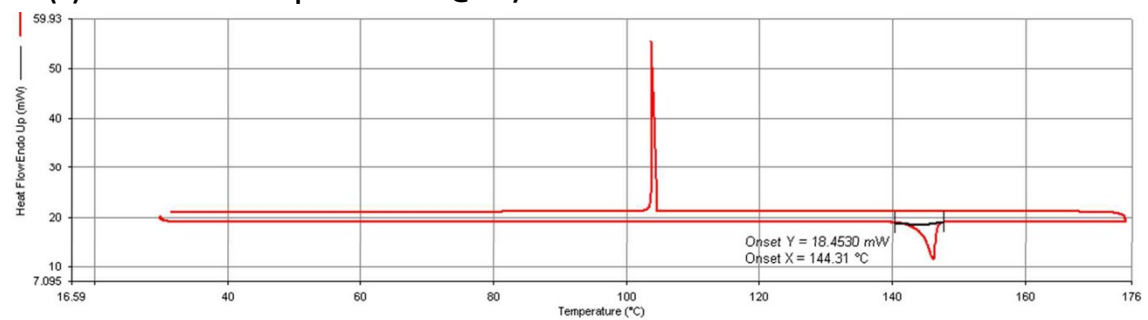

Supplement: c5ce01721a3.pdf [file c5ce01721a3.pdf]
